# Supplementary material for: Structure–Activity Relationship Studies of 9-Alkylamino-1,2,3,4-tetrahydroacridines against Leishmania (Leishmania) infantum Promastigotes
Source: MDPI journal article supplement (doi:10.3390/pharmaceutics15020669), 2023-02-16
Supplement: s1 [file s1]

## Supplementary information:

### Synthesis of 9-chloroacridines (5):

9-chloro-1,2,3,4-tetrahydroacridine **5.a**. Brown solid, m.p. 67-69 °C (68-70 °C)[15], yield 41 % [Conv.] or 61 % [MW].  $^1\text{H}$  NMR (300 MHz,  $\text{CDCl}_3$ ):  $\delta$  1.87-1.99 (4H, m, H-2,3), 2.98 (2H, t,  $J$  = 6.2 Hz, H-1), 3.11 (2H, t,  $J$  = 6.2 Hz, H-4), 7.51 (1H, ddd,  $J$  = 8.2, 6.9 and 1.3 Hz, H-7), 7.64 (1H, ddd,  $J$  = 8.4, 6.8 and 1.5 Hz, H-6), 7.96 (1H, d,  $J$  = 8.0 Hz, H-5), 8.13 (1H, dd,  $J$  = 8.4 and 1.4 Hz, H-8).  $^{13}\text{C}$  NMR (75 MHz,  $\text{CDCl}_3$ ):  $\delta$  22.6-22.7 (C-2,3), 27.5 (C-1), 34.2 (C-4), 123.6 (C-8), 125.3 (C-8a), 126.4 (C-7), 128.6 (C-6), 128.8 (C-9a), 129.2 (C-5), 141.4 (C-9), 146.6 (C-10a), 159.4 (C-4a). HRMS-ESI [ $m/z$ ]: Calculated for  $\text{C}_{13}\text{H}_{13}\text{ClN}$  [ $\text{M}+\text{H}$ ] $^+$ : 218.0731; Determined 218.0730.

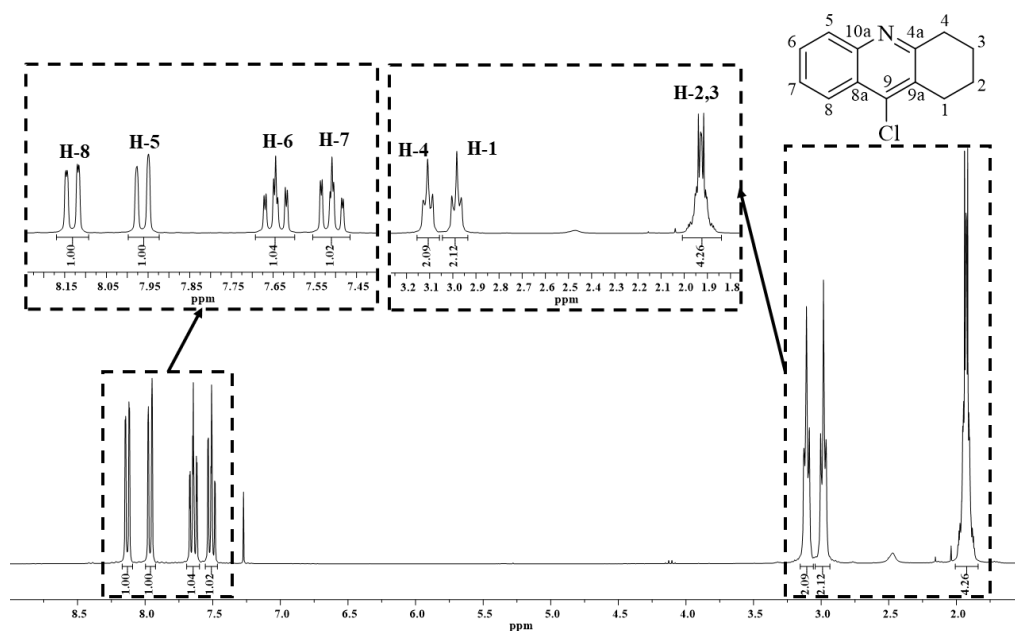

Figure S1.  $^1\text{H}$  NMR spectrum of 9-chloro-1,2,3,4-tetrahydroacridine (**5.a**).

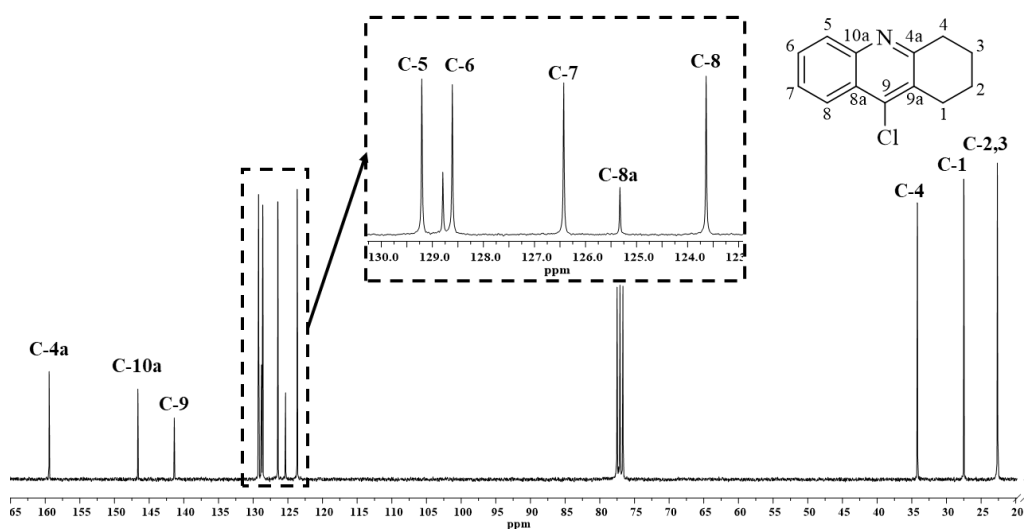

**Figure S2.**  $^{13}\text{C}$  NMR spectrum of 9-chloro-1,2,3,4-tetrahydroacridine (**5.a**).

6,9-dichloro-1,2,3,4-tetrahydroacridine **5.b**. Light brown solid, m.p. 81-84 °C (81-83 °C) [15], yield 68 % [Conv.] or 71 % [MW].  $^1\text{H}$  NMR (300 MHz,  $\text{CDCl}_3$ ):  $\delta$  1.85-2.02 (4H, m, H-2,3), 2.98 (2H, t,  $J$  = 6.5 Hz, H-1), 3.09 (2H, t,  $J$  = 6.5 Hz, H-4), 7.45 (1H, dd,  $J$  = 9.0 and 2.1 Hz, H-7), 7.95 (1H, d,  $J$  = 2.0 Hz, H-5), 8.05 (1H, d,  $J$  = 8.9 Hz, H-8).  $^{13}\text{C}$  NMR (75 MHz,  $\text{CDCl}_3$ ):  $\delta$  22.5 (C-2,3), 27.5 (C-1), 34.2 (C-4), 123.8 (C-8a), 125.1 (C-8), 127.4 (C-7), 127.6 (C-5), 129.2 (C-9a), 135.1 (C-6), 141.4 (C-9), 146.9 (C-10a), 160.8 (C-4a). HRMS-ESI [ $m/z$ ]: Calculated for  $\text{C}_{13}\text{H}_{12}\text{Cl}_2\text{N}$  [ $\text{M}+\text{H}$ ] $^+$ : 252.0341; Determined 252.0340.

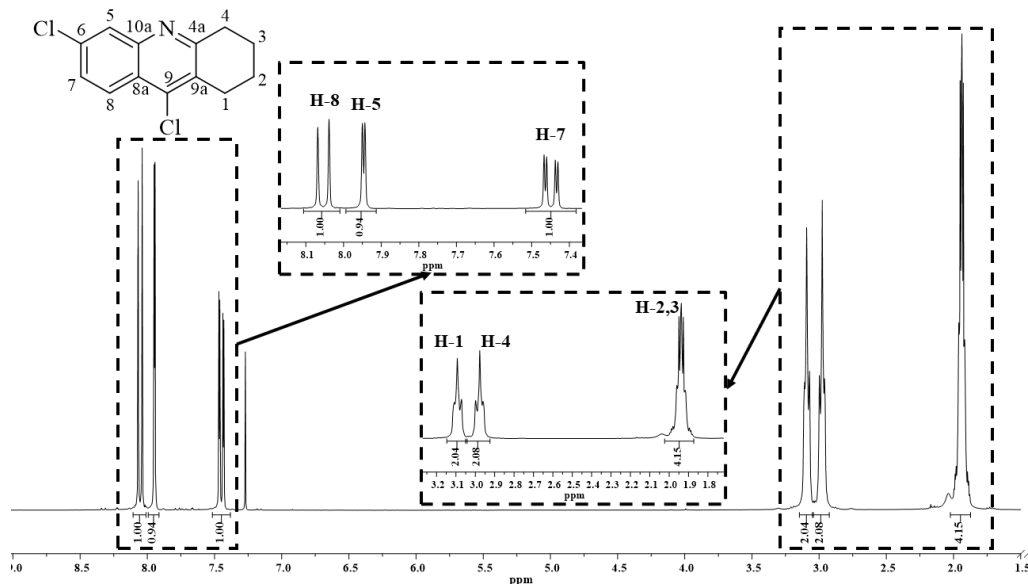

**Figure S3.**  $^1\text{H}$  NMR spectrum of 6,9-dichloro-1,2,3,4-tetrahydroacridine (**5.b**)

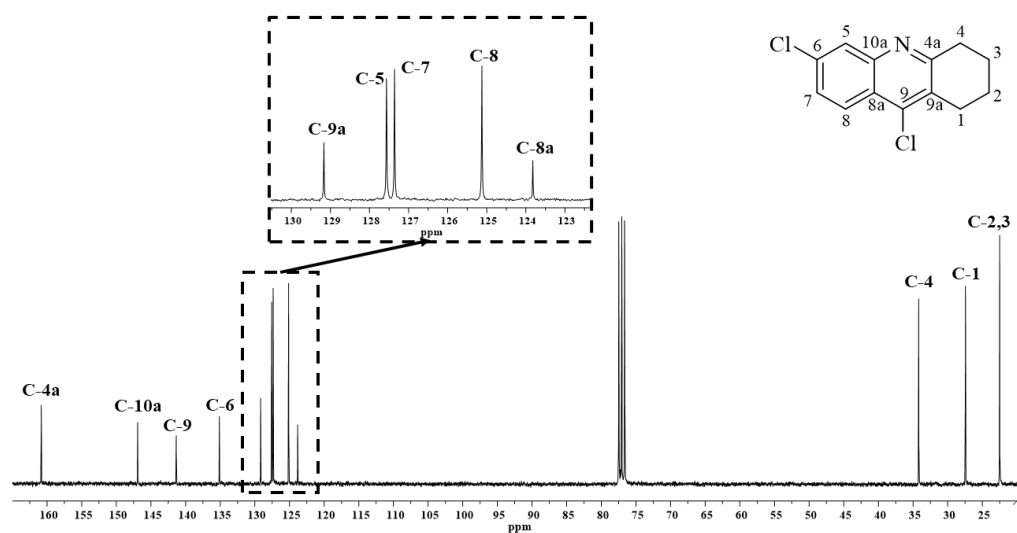

**Figure S4.**  $^{13}\text{C}$  NMR spectrum of 6,9-dichloro-1,2,3,4-tetrahydroacridine (5.b)

## Synthesis of 9-alkylamino-1,2,3,4-tetrahydroacridines (6.a-n):

*\*Derivative 6.h as example of NMR spectra.*

*N*<sup>1</sup>-(1,2,3,4-tetrahydroacridin-9-yl)ethane-1,2-diamine **6.a**, Brown solid, m.p. 125-136 °C, yield 61 %. <sup>1</sup>H NMR (300 MHz, CD<sub>3</sub>OD): δ 1.87-1.95 (4H, m, H-2,3), 2.74-2.81 (2H, m, H-1), 2.93 (2H, t, *J* = 6.5 Hz, H-2'), 2.96-3.02 (2H, m, H-4), 3.60 (2H, t, *J* = 6.5 Hz, H-1'), 7.40 (1H, ddd, *J* = 8.4, 6.8 and 1.3 Hz, H-7), 7.58 (1H, ddd, *J* = 8.4, 6.8 and 1.4 Hz, H-6), 7.78 (1H, dd, *J* = 8.5 and 1.3 Hz, H-5), 8.13 (1H, dd, *J* = 8.4 and 1.4 Hz, H-8). <sup>13</sup>C NMR (75 MHz, CD<sub>3</sub>OD): δ 22.1 (C-2), 22.6 (C-3), 24.6 (C-1), 32.4 (C-4), 41.6 (C-2'), 50.0 (C-1'), 115.9 (C-9a), 119.8 (C-8a), 123.0 (C-8), 123.7 (C-7), 125.9 (C-5), 128.8 (C-6), 145.8 (C-10a), 152.1 (C-9), 157.3 (C-4a). HRMS-ESI [*m/z*]: Calculated for C<sub>15</sub>H<sub>20</sub>N<sub>3</sub> [*M*+H]<sup>+</sup>: 242.1652; Determined 242.1647.

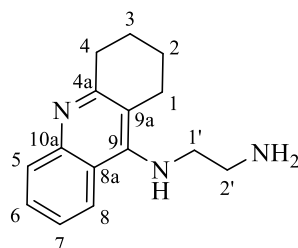

**Figure S5.** *N*<sup>1</sup>-(1,2,3,4-tetrahydroacridin-9-yl)ethane-1,2-diamine (**6.a**).

*N*<sup>1</sup>-(1,2,3,4-tetrahydroacridin-9-yl)propane-1,3-diamine **6.b**, Brown oil, yield 58 %. <sup>1</sup>H NMR (300 MHz, CD<sub>3</sub>OD): δ 1.78 (2H, p, *J* = 7.1 Hz, H-2'), 1.81-1.92 (4H, m, H-2,3), 2.70 (4H, t, *J* = 7.0 Hz, H-3',1), 2.95 (2H, t, *J* = 5.9 Hz, H-4), 3.56 (2H, t, *J* = 7.1 Hz, H-1'), 7.35 (1H, ddd, *J* = 8.4, 6.8 and 1.3 Hz, H-7), 7.54 (1H, ddd, *J* = 8.4, 6.8 and 1.4 Hz, H-6), 7.77 (1H, dd, *J* = 8.6 and 1.3 Hz, H-5), 8.09 (1H, dd, *J* = 8.4 and 1.3 Hz, H-8). <sup>13</sup>C NMR (75 MHz, CD<sub>3</sub>OD): δ 23.6 (C-2), 24.0 (C-3), 26.2 (C-1), 34.1 (C-4), 34.6 (C-2'), 40.1 (C-3'), 47.3 (C-1'), 116.9 (C-9a), 121.2 (C-8a), 124.3 (C-8), 124.8 (C-7), 127.8 (C-5), 129.8 (C-6), 147.7 (C-10a), 153.0 (C-9), 159.0 (C-4a). HRMS-ESI [*m/z*]: Calculated for C<sub>16</sub>H<sub>22</sub>N<sub>3</sub> [*M*+H]<sup>+</sup>: 256.1808; Determined 256.1816.

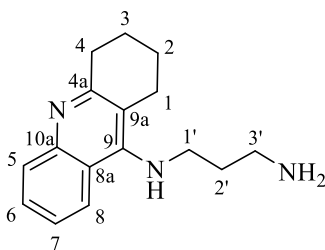

**Figure S6.** *N*<sup>1</sup>-(1,2,3,4-tetrahydroacridin-9-yl)propane-1,3-diamine (**6.b**).

*N*<sup>1</sup>-(1,2,3,4-tetrahydroacridin-9-yl)butane-1,4-diamine **6.c**. Brown oil, yield 43 %. <sup>1</sup>H NMR (500 MHz, CD<sub>3</sub>OD): δ 1.61-1.69 (2H, m, H-2'), 1.69-1.77 (2H, m, H-3'), 1.88-1.96 (4H, m, H-2,3), 2.75-2.79 (2H, m, H-1), 2.81 (2H, t, *J* = 7.3 Hz, H-4'), 3.00 (2H, t, *J* = 5.9 Hz, H-4), 3.62 (2H, t, *J* = 7.0 Hz, H-1'), 7.41 (1H, ddd, *J* = 8.3, 6.8 and 1.3 Hz, H-7), 7.60 (1H, ddd, *J* = 8.3, 6.8 and 1.3 Hz, H-6), 7.79 (1H, dd, *J* = 8.5 and 1.3 Hz, H-5), 8.15 (1H, dd, *J* = 8.6 and 1.3 Hz, H-8). <sup>13</sup>C NMR (125 MHz, CD<sub>3</sub>OD): δ 22.1 (C-2), 22.6 (C-3), 24.7 (C-1), 27.0 (C-2'), 27.9 (C-3'), 32.2 (C-4), 39.9 (C-4'), 48.12 (C-1'), 115.2 (C-9a), 119.5 (C-8a), 123.2 (C-8), 123.6 (C-7), 125.7 (C-5), 128.9 (C-6), 145.6 (C-10a), 152.3 (C-9), 157.0 (C-4a). HRMS-ESI [*m/z*]: Calculated for C<sub>17</sub>H<sub>24</sub>N<sub>3</sub> [*M*+H]<sup>+</sup>: 270.1965; Determined 270.1973.

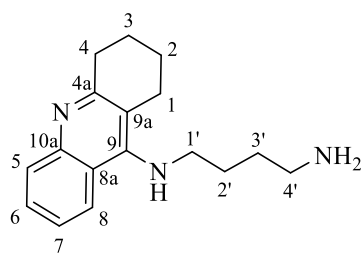

**Figure S7.** *N*<sup>1</sup>-(1,2,3,4-tetrahydroacridin-9-yl)butane-1,4-diamine (**6.c**).

*N*<sup>1</sup>-(1,2,3,4-tetrahydroacridin-9-yl)pentane-1,5-diamine **6.d**. Brown oil, yield 53 %. <sup>1</sup>H NMR (300 MHz, CD<sub>3</sub>OD): δ 1.37-1.50 (2H, m, H-3'), 1.52-1.64 (2H, m, H-4'), 1.71 (2H, p, *J* = 7.4 Hz; H-2'), 1.85-2.00 (4H, m, H-2,3), 2.77 (2H, t, *J* = 7.4 Hz, H-5'), 2.77 (2H, broad s, H-1), 3.00 (2H, broad s, H-4), 3.60 (2H, t, *J* = 7.4 Hz, H-1'), 7.40 (1H, ddd, *J* = 8.4, 6.8 and 1.3 Hz, H-7), 7.60 (1H, ddd, *J* = 8.4, 6.8 and 1.4 Hz, H-6), 7.78 (1H, dd, *J* = 8.4 and 1.2 Hz; H-5), 8.14 (1H, dd, *J* = 8.4 and 1.3 Hz, H-8). <sup>13</sup>C NMR (75 MHz, CD<sub>3</sub>OD): δ 22.1 (C-3'), 22.6 (C-2), 23.6 (C-3), 24.7 (C-4), 29.3 (C-4'), 30.4 (C-2'), 32.3 (C-1), 40.0 (C-5'), 48.1 (C-1'), 115.1 (C-9a), 119.5 (C-8a), 123.2 (C-8), 123.5 (C-7), 125.7 (C-5), 128.8 (C-6), 145.6 (C-10a), 152.3 (C-9), 156.9 (C-4a). HRMS-ESI [*m/z*]: Calculated for C<sub>18</sub>H<sub>26</sub>N<sub>3</sub> [*M*+H]<sup>+</sup>: 284.2121; Determined: 284.2139.

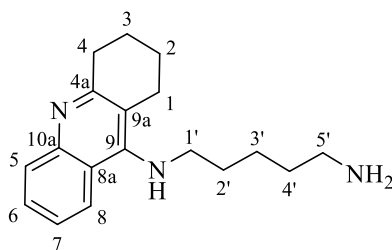

**Figure S8.** *N*<sup>1</sup>-(1,2,3,4-tetrahydroacridin-9-yl)pentane-1,5-diamine (**6.d**).

*N*<sup>1</sup>-(1,2,3,4-tetrahydroacridin-9-yl)octane-1,8-diamine **6.e**. Brown oil, yield 69 %. <sup>1</sup>H NMR (500 MHz, CDCl<sub>3</sub>): δ 1.08-1.25 (8H, m, H-3',4',5',6'), 1.35-1.46 (2H, m, H-7'), 1.50 (2H, p, *J* = 7.3 Hz, H-2'), 1.71-1.85 (4H, m, H-2,3), 2.55 (2H, d, *J* = 5.4 Hz, H-1), 2.64 (2H, t, *J* = 7.4 Hz, H-8'), 2.94 (2H, t, *J* = 6.1 Hz,

H-4), 3.34 (2H, t,  $J = 7.3$  Hz, H-1'), 2.94 (2H, t,  $J = 6.1$  Hz, H-4), 3.34 (2H, t,  $J = 7.3$  Hz, H-1'), 7.22 (1H, ddd,  $J = 8.4, 6.7$  and  $1.3$  Hz, H-7), 7.42 (1H, ddd,  $J = 8.4, 6.7$  and  $1.3$  Hz, H-6), 7.80 (1H, dd,  $J = 8.4$  and  $1.3$  Hz, H-5), 7.85 (1H, dd,  $J = 8.4$  and  $1.3$  Hz, H-8).  $^{13}\text{C}$  NMR (125 MHz,  $\text{CDCl}_3$ ):  $\delta$  22.7 (C-2), 23.0 (C-3), 24.7 (C-1), 26.6 (C-6'), 26.7 (C-3'), 29.2 (C-4',5'), 31.2 (C-7'), 31.6 (C-2'), 33.7 (C-4), 40.9 (C-8'), 49.2 (C-1'), 115.5 (C-9a), 120.0 (C-8a), 122.9 (C-8), 123.5 (C-7), 128.2 (C-5), 128.3 (C-6), 147.1 (C-10a), 150.9 (C-9), 158.1 (C-4a). HRMS-ESI  $[m/z]$ : Calculated for  $\text{C}_{21}\text{H}_{32}\text{N}_3$   $[\text{M}+\text{H}]^+$ : 326.2591; Determined: 326.2608.

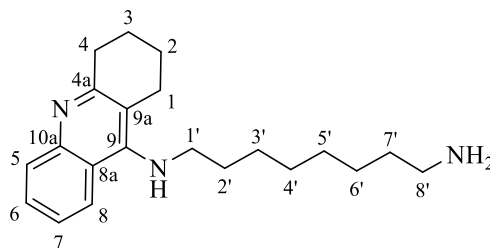

**Figure S9.**  $N^1$ -(1,2,3,4-tetrahydroacridin-9-yl)octane-1,8-diamine (**6.e**).

$N^1$ -(1,2,3,4-tetrahydroacridin-9-yl)decane-1,10-diamine **6.f**. Brown oil, yield 65 %.  $^1\text{H}$  NMR (300 MHz,  $\text{CD}_3\text{OD}$ ):  $\delta$  1.19-1.39 (8H, m, H-4',5',6',7'), 1.44-1.56 (2H, m, H-8'), 1.63 (2H, p,  $J = 7.1$  Hz, H-3'), 1.87-1.95 (4H, m, H-2,3), 2.64-2.73 (2H, m, H-10'), 2.71-2.80 (2H, m, H-4), 2.95-3.02 (2H, m, H-1), 3.53 (2H, t,  $J = 7.1$  Hz, H-1'), 7.37 (1H, ddd,  $J = 8.3, 6.8$  and  $1.3$  Hz, H-7), 7.56 (1H, ddd,  $J = 8.4, 6.8$  and  $1.4$  Hz, H-6), 7.78 (1H, dd,  $J = 8.8$  and  $1.1$  Hz, H-5), 8.10 (1H, dd,  $J = 8.5$  and  $1.1$  Hz, H-8).  $^{13}\text{C}$  NMR (75 MHz,  $\text{CD}_3\text{OD}$ ):  $\delta$  22.3 (C-3), 22.7 (C-2), 24.8 (C-4), 26.4 (C-9'), 26.5 (C-2'), 28.9-29.1 (C-4',5',6',7'), 30.7 (C-8'), 30.9 (C-3'), 32.7 (C-1), 40.6 (C-10'), 48.3 (C-1'), 115.2 (C-9a), 119.8 (C-8a), 123.1 (C-8), 123.3 (C-7), 126.4 (C-5), 128.4 (C-6), 146.4 (C-10a), 152.0 (C-9), 157.5 (C-4a). HRMS-ESI  $[m/z]$ : Calculated for  $\text{C}_{23}\text{H}_{36}\text{N}_3$   $[\text{M}+\text{H}]^+$ : 354.2904; Determined: 354.2912.

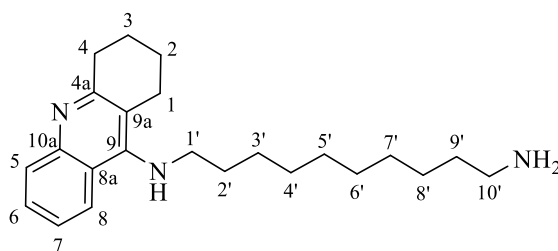

**Figure S10.**  $N^1$ -(1,2,3,4-tetrahydroacridin-9-yl)decane-1,10-diamine (**6.f**).

$N^1$ -(1,2,3,4-tetrahydroacridin-9-yl)dodecane-1,12-diamine **6.g**. Brown oil, yield 73 %.  $^1\text{H}$  NMR (300 MHz,  $\text{CD}_3\text{OD}$ ):  $\delta$  1.14-1.39 (16H, m, H-2',4',5',6',7',8',9',11'), 1.54 (2H, p,  $J = 7.5$  Hz, H-10'), 1.62 (2H, p,  $J = 7.5$  Hz, H-3'), 1.81-1.93 (4H, m, H-2,3), 2.72 (2H, broad s, H-1), 2.75 (2H, t,  $J = 7.2$  Hz, H-12'), 2.98 (2H, broad s, H-4), 3.53 (2H, t,  $J = 7.2$  Hz, H-1'), 7.36 (1H, ddd,  $J = 8.4, 6.8$  and  $1.3$  Hz, H-7),

7.56 (1H, ddd,  $J = 8.4, 6.8$  and  $1.3$  Hz, H-6), 7.78 (1H, dd,  $J = 8.4$  and  $1.2$  Hz, H-5), 8.09 (1H, dd,  $J = 8.4$  and  $1.3$  Hz, H-8).  $^{13}\text{C}$  NMR (75 MHz,  $\text{CD}_3\text{OD}$ ):  $\delta$  22.2 (C-2), 22.7 (C-3), 24.7 (C-4), 26.4 (C-11'), 26.5 (C-2'), 29.0 (C-8'), 29.1 (C-5'), 29.2-29.3 (C4',6',7',9'), 30.0 (C-10'), 30.9 (C-3'), 32.5 (C-1), 40.3 (C-12'), 48.3 (C-1'), 115.0 (C-9a), 119.7 (C-8a), 123.1 (C-8), 123.3 (C-7), 126.2 (C-5), 128.5 (C-6), 146.1 (C-10a), 152.1 (C-9), 157.2 (C-4a). HRMS-ESI  $[m/z]$ : Calculated for  $\text{C}_{25}\text{H}_{40}\text{N}_3$   $[\text{M}+\text{H}]^+$ : 382.3217; Determined: 382.3239.

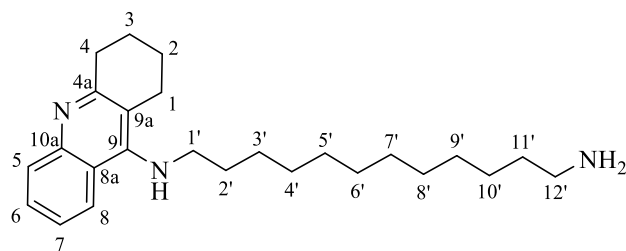

**Figure S11.**  $N^1$ -(1,2,3,4-tetrahydroacridin-9-yl)dodecane-1,12-diamine (**6.g**).

$N^1$ -(6-chloro-1,2,3,4-tetrahydroacridin-9-yl)ethane-1,2-diamine **6.h**, m.p. 296-300 °C, yield 46 %.  $^1\text{H}$  NMR (300 MHz,  $\text{CD}_3\text{OD}$ ):  $\delta$  1.91 (4H, p,  $J = 3.3$  Hz, H-2,3), 2.72-2.79 (2H, m, H-4), 2.92 (2H, t,  $J = 6.5$  Hz, H-2'), 2.95-3.00 (2H, m, H-1), 3.58 (2H, t,  $J = 6.5$  Hz, H-1'), 7.33 (1H, dd,  $J = 9.1$  and  $2.2$  Hz, H-7), 7.74 (1H, d,  $J = 2.2$  Hz, H-5), 8.09 (1H, d,  $J = 9.1$  Hz, H-8).  $^{13}\text{C}$  NMR (75 MHz,  $\text{CD}_3\text{OD}$ ):  $\delta$  22.1 (C-3), 22.5 (C-2), 24.6 (C-4), 32.9 (C-1), 41.7 (C-2'), 50.2 (C-1'), 116.3 (C-9a), 118.3 (C-8a), 123.9 (C-7), 125.0 (C-8), 125.3 (C-5), 134.1 (C-6), 147.1 (C-10a), 151.8 (C-9), 159.2 (C-4a). HRMS-ESI  $[m/z]$ : Calculated for  $\text{C}_{15}\text{H}_{18}\text{ClN}_3$   $[\text{M}+\text{H}]^+$ : 276.1262; Determined: 276.1281.

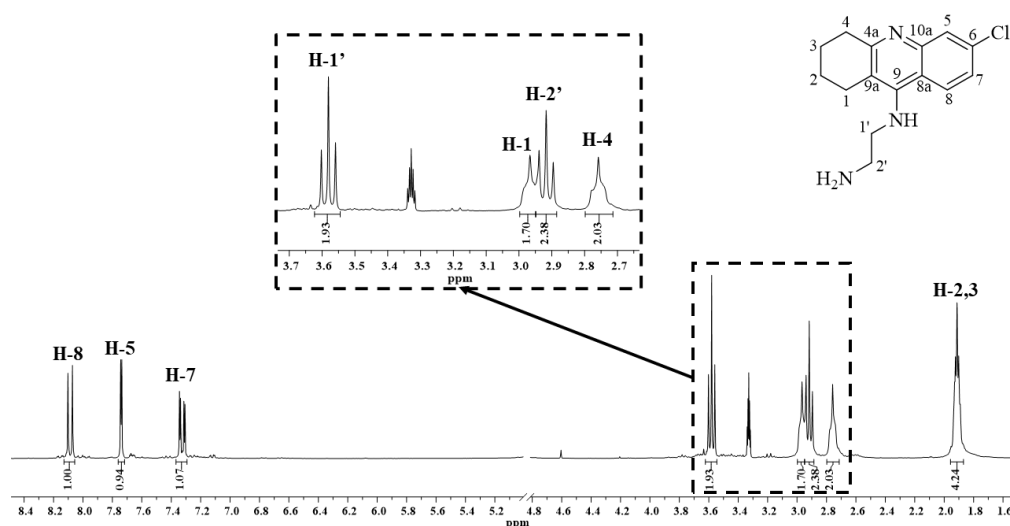

**Figure S12.**  $^1\text{H}$  NMR spectrum of  $N^1$ -(6-chloro-1,2,3,4-tetrahydroacridin-9-yl)ethane-1,2-diamine (**6.h**).

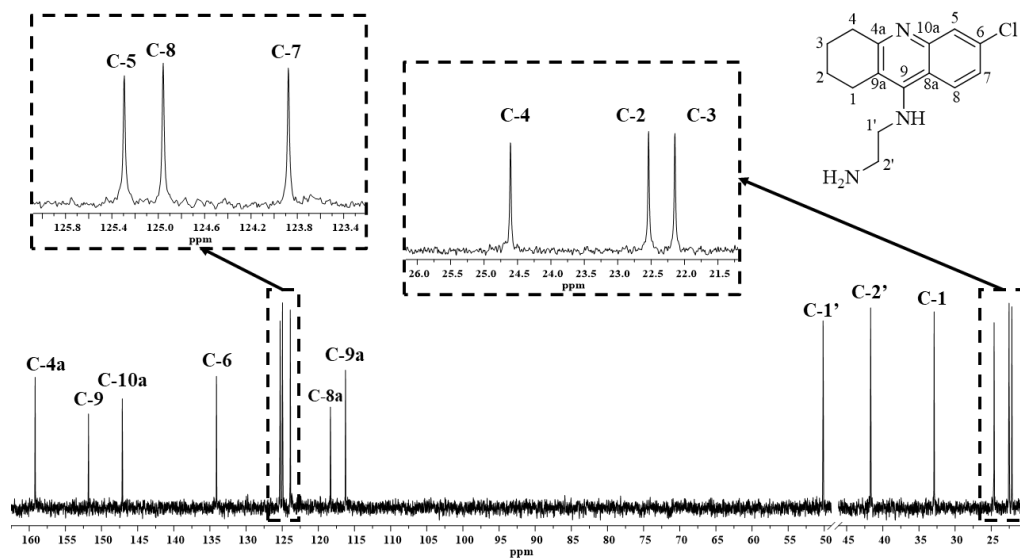

**Figure S13.** <sup>13</sup>C NMR spectrum of *N*<sup>1</sup>-(6-chloro-1,2,3,4-tetrahydroacridin-9-yl)ethane-1,2-diamine (**6.h**).



*N*<sup>1</sup>-(6-chloro-1,2,3,4-tetrahydroacridin-9-yl)propane-1,3-diamine **6.i**. Yellow solid, m.p. 179-182 °C, yield 48 %. <sup>1</sup>H NMR (300 MHz, CD<sub>3</sub>OD): δ 1.92-1.99 (4H, m, H-2,3), 2.09 (2H, p, *J* = 7.6 Hz, H-2'), 2.76 (2H, broad s, H-1), 3.03 (2H, broad s, H-4), 3.04 (2H, t, *J* = 7.1 Hz, H-3'), 3.85 (2H, t, *J* = 7.1 Hz, H-1'), 7.49 (1H, dd, *J* = 9.2 and 2.2 Hz, H-7), 7.80 (1H, d, *J* = 2.2 Hz, H-5), 8.26 (1H, d, *J* = 7.2 Hz, H-8). <sup>13</sup>C NMR (75 MHz, CD<sub>3</sub>OD): δ 21.3 (C-3), 22.0 (C-2), 24.3 (C-1), 28.4 (C-4), 30.6 (C-2'), 36.9 (C-3'), 44.8 (C-1'), 114.7 (C-9a), 116.5 (C-8a), 121.9 (C-5), 124.9 (C-7), 125.8 (C-8), 136.3 (C-6), 143.3 (C-10a), 153.7 (C-9), 155.6 (C-4a). HRMS-ESI [*m/z*]: Calculated for C<sub>16</sub>H<sub>21</sub>ClN<sub>3</sub> [*M*+H]<sup>+</sup>: 290.1419; Determined: 290.1424.

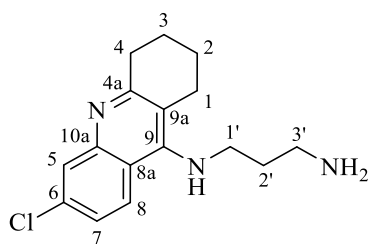

**Figure S14.** *N*<sup>1</sup>-(1,2,3,4-tetrahydroacridin-9-yl)propane-1,3-diamine (**6.i**).

*N*<sup>1</sup>-(6-chloro-1,2,3,4-tetrahydroacridin-9-yl)butane-1,4-diamine **6.j**. Brown solid, 115-120 °C, yield 55 %. <sup>1</sup>H NMR (300 MHz, CD<sub>3</sub>OD): δ 1.63-1.77 (4H, m, H-2',3'), 1.87-1.93 (4H, m, H-2,3), 2.68-2.76 (2H, m, H-1), 2.87 (2H, t, *J* = 7.2 Hz, H-4'), 2.91-2.98 (2H, m, H-4), 3.59 (2H, t, *J* = 6.7 Hz, H-1'), 7.30 (1H, dd, *J* = 9.1 and 2.2 Hz, H-7), 7.72 (1H, d, *J* = 2.2 Hz, H-5), 8.07 (1H, d, *J* = 9.1 Hz, H-8). <sup>13</sup>C NMR (75 MHz, CD<sub>3</sub>OD): δ 21.9 (C-2), 22.4 (C-3), 24.5 (C-1), 25.7 (C-3'), 27.7 (C-2'), 32.6 (C-4), 39.3 (C-4'), 47.5 (C-1'), 115.4 (C-9a), 117.8 (C-8a), 123.6 (C-7), 124.9 (C-5), 124.9 (C-8), 134.0 (C-6), 146.7 (C-10a), 151.6 (C-9), 158.6 (C-4a). HRMS-ESI [*m/z*]: Calculated for C<sub>17</sub>H<sub>23</sub>ClN<sub>3</sub> [*M*+H]<sup>+</sup>: 304.1575; Determined: 304.1591.

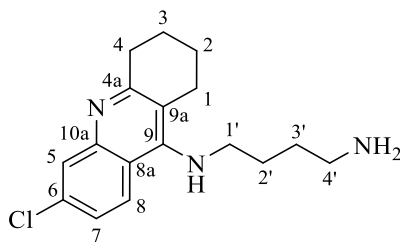

**Figure S15.** *N*<sup>1</sup>-(6-chloro-1,2,3,4-tetrahydroacridin-9-yl)butane-1,4-diamine (**6.j**).

*N*<sup>1</sup>-(6-chloro-1,2,3,4-tetrahydroacridin-9-yl)pentane-1,5-diamine **6.k**. Brown solid, m.p. 68-74 °C, yield 31 %. <sup>1</sup>H NMR (300 MHz, CD<sub>3</sub>OD): δ 1.38-1.51 (2H, m, H-3'), 1.54-1.65 (2H, m, H-4'), 1.62-1.78 (2H, m, H-2'), 1.88-1.95 (4H, m, H-2,3), 2.74 (2H, broad s, H-1), 2.80 (2H, t, *J* = 7.5 Hz, H-5'), 2.97 (2H, broad s, H-4), 3.58 (2H, t, *J* = 7.2 Hz, H-1'), 7.33 (1H, dd, *J* = 9.2 and 2.2 Hz, H-7), 7.74 (1H, d, *J* = 2.1 Hz, H-5), 8.10 (1H, d, *J* = 9.2 Hz, H-8). <sup>13</sup>C NMR (75 MHz, CD<sub>3</sub>OD): δ 22.2 (C-2), 22.6 (C-3), 23.6

(C-3'), 24.7 (C-1), 28.7 (C-4'), 30.4 (C-2'), 32.8 (C-4), 39.8 (C-5'), 48.1 (C-1'), 115.5 (C-9a), 118.1 (C-8a), 123.7 (C-7), 125.1 (C-8), 125.2 (C-5), 134.1 (C-6), 147.1 (C-10a), 151.9 (C-9), 159.0 (C-4a). HRMS-ESI [m/z]: Calculated for C<sub>18</sub>H<sub>25</sub>ClN<sub>3</sub> [M+H]<sup>+</sup>: 318.1732; Determined 318.1727.

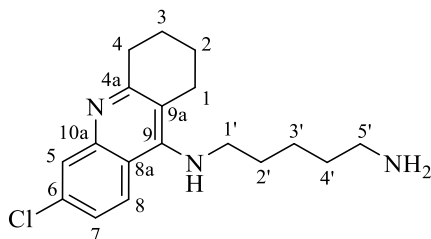

**Figure S16.** *N*<sup>1</sup>-(6-chloro-1,2,3,4-tetrahydroacridin-9-yl)pentane-1,5-diamine (**6.k**).

*N*<sup>1</sup>-(6-chloro-1,2,3,4-tetrahydroacridin-9-yl)octane-1,8-diamine **6.l**. Brown oil, yield 50 %. <sup>1</sup>H NMR (300 MHz, CD<sub>3</sub>OD): δ 1.22-1.43 (8H, m, H-2',4',5',7'), 1.54-1.72 (4H, m, H-3',6'), 1.83-1.97 (4H, m, H-2,3), 2.70 (2H, broad s, H-1), 2.87 (2H, t, *J* = 7.4 Hz, H-8'), 2.93-3.00 (2H, m, H-4), 3.57 (2H, t, *J* = 7.2 Hz, H-1'), 7.32 (1H, dd, *J* = 9.1 and 2.2 Hz, H-7), 7.74 (1H, d, *J* = 2.2 Hz, H-5), 8.09 (1H, d, *J* = 9.2 Hz, H-8). <sup>13</sup>C NMR (75 MHz, CD<sub>3</sub>OD): δ 22.0 (C-2), 22.5 (C-3), 24.5 (C-1), 26.0 (C-7'), 26.4 (C-2'), 27.6 (C-6'), 28.7 (C-4'), 28.8 (C-5'), 30.7 (C-3'), 32.5 (C-4), 39.5 (C-8'), 48.2 (C-1'), 115.0 (C-9a), 117.7 (C-8a), 123.7 (C-7), 124.6 (C-5), 125.3 (C-8), 134.4 (C-6), 146.5 (C-10a), 152.3 (C-9), 158.3 (C-4a). HRMS-ESI [m/z]: Calculated for C<sub>21</sub>H<sub>31</sub>N<sub>3</sub> [M+H]<sup>+</sup>: 360.2201; Determined: 360.2228.

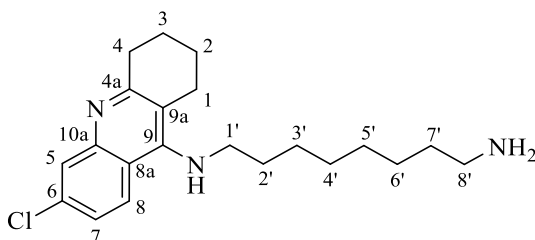

**Figure S17.** *N*<sup>1</sup>-(6-chloro-1,2,3,4-tetrahydroacridin-9-yl)octane-1,8-diamine (**6.l**).

*N*<sup>1</sup>-(6-chloro-1,2,3,4-tetrahydroacridin-9-yl)decane-1,10-diamine **6.m**. Brown oil, yield 51 %. <sup>1</sup>H NMR (300 MHz, CD<sub>3</sub>OD): δ 1.20-1.39 (12H, m, H-2',4',5',6',7',9'), 1.60 (4H, p, *J* = 7.1 Hz, H-3',8'), 1.86-1.94 (4H, m, H-2,3), 2.70 (2H, broad s, H-1), 2.85 (2H, t, *J* = 7.2 Hz, H-10'), 2.96 (2H, broad s, H-4), 3.55 (2H, t, *J* = 7.1 Hz, H-1'), 7.30 (1H, dd, *J* = 9.1 and 2.2 Hz, H-7), 7.73 (1H, d, *J* = 2.2 Hz, H-5), 8.08 (1H, d, *J* = 9.1 Hz, H-8). <sup>13</sup>C NMR (75 MHz, CD<sub>3</sub>OD): δ 22.2 (C-2), 22.6 (C-3), 24.6 (C-1), 26.2 (C-9'), 26.4 (C-9'), 28.2 (C-8'), 28.9 (C-5',6'), 29.0 (C-7'), 29.1 (C-4'), 30.8 (C-3'), 32.8 (C-4), 39.7 (C-10'), 48.2 (C-1'), 115.2 (C-9a), 118.0 (C-8a), 123.6 (C-7), 125.0 (C-5), 125.2 (C-8), 134.1 (C-6), 147.0 (C-10a), 152.0 (C-9), 158.7 (C-4a). HRMS-ESI [m/z]: Calculated for C<sub>23</sub>H<sub>35</sub>ClN<sub>3</sub> [M+H]<sup>+</sup>: 388.2514; Determined: 388.2530.

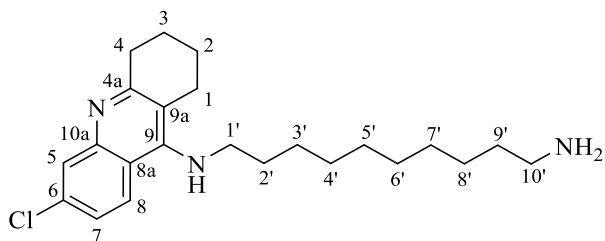

**Figure S18.** *N*<sup>1</sup>-(6-chloro-1,2,3,4-tetrahydroacridin-9-yl)decane-1,10-diamine (**6.m**).

*N*<sup>1</sup>-(6-chloro-1,2,3,4-tetrahydroacridin-9-yl)dodecane-1,12-diamine **6.n**. Brown oil, <sup>1</sup>H NMR (300 MHz, CD<sub>3</sub>OD): δ 1.19-1.43 (16H, m, H- 2',4',5',6',7',8',9',11'), 1.56-1.71 (4H, m, H-3',10'), 1.89-1.96 (4H, m, H-2,3), 2.72 (2H, broad s, H-1), 2.89 (2H, t, *J* = 7.2 Hz, H-12'), 2.97 (2H, broad s, H-4), 3.59 (2H, t, *J* = 7.1 Hz, H-1'), 7.34 (1H, dd, *J* = 9.1 and 2.2 Hz, H-7), 7.75 (1H, d, *J* = 2.2 Hz, H-5), 8.12 (1H, d, *J* = 9.1 Hz, H-8). <sup>13</sup>C NMR (75 MHz, CD<sub>3</sub>OD): δ 22.1 (C-2), 22.5 (C-3), 24.6 (C-1), 26.1 (C-11'), 26.4 (C-2'), 27.7 (C-10'), 28.9 (C-5',8'), 29.1 (C-7'), 29.2 (C-6'), 30.7 (C-3'), 32.5 (C-4), 39.5 (C-12'), 48.2 (C-1'), 115.1 (C-9a), 117.8 (C-8a), 123.7 (C-7), 124.7 (C-5), 125.3 (C-8), 134.4 (C-6), 146.6 (C-10a), 152.3 (C-9), 158.4 (C-4a). HRMS-ESI [*m/z*]: Calculated for C<sub>25</sub>H<sub>39</sub>ClN<sub>3</sub> [*M*+H]<sup>+</sup>: 416.2827; Determined: 416.2841.

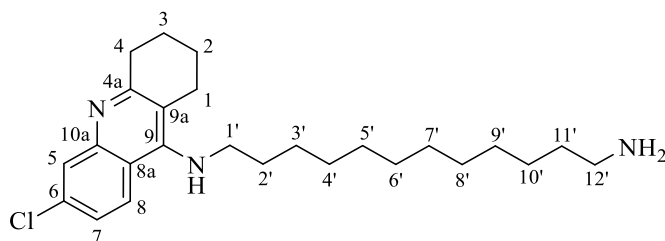

**Figure S19.** *N*<sup>1</sup>-(6-chloro-1,2,3,4-tetrahydroacridin-9-yl)dodecane-1,12-diamine (**6.n**).

*N*<sup>1</sup>,*N*<sup>2</sup>-bis(1,2,3,4-tetrahydroacridin-9-yl)ethane-1,2-diamine **10.a**, m.p. 120-125 °C (123-125 °C)[16]. <sup>1</sup>H NMR (300 MHz, CD<sub>3</sub>OD): δ 1.61-1.71 (4H, m, H-3), 1.72-1.83 (4H, m, H-2), 2.30 (4H, t, *J* = 6.2 Hz, H-1), 2.80 (4H, t, *J* = 6.5 Hz, H-4), 3.97 (4H, s, H-1'), 7.28 (2H, ddd, *J* = 8.4, 6.5 and 1.5 Hz, H-7), 7.60 (2H, ddd, *J* = 8.4, 6.6 and 1.2 Hz, H-6), 7.66 (2H, dd, *J* = 8.4 and 1.4 Hz, H-5), 7.87 (2H, d, *J* = 8.4 Hz, H-8). <sup>13</sup>C NMR (75 MHz, CD<sub>3</sub>OD): δ 21.5 (C-2), 22.1 (C-3), 24.6 (C-1), 31.1 (C-4), 48.4 (C-1'), 114.2 (C-9a), 118.2 (C-8a), 122.7 (C-8), 123.7 (C-7), 124.2 (C-5), 129.5 (C-6), 143.6 (C-10a), 152.5 (C-9), 155.4 (C-4a). HRMS-ESI [*m/z*]: Calculated for C<sub>28</sub>H<sub>31</sub>N<sub>4</sub> [*M*+H]<sup>+</sup>: 423.2543; Determined: 423.2576.

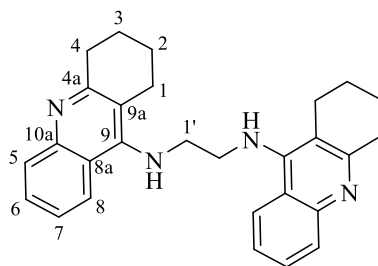

**Figure S20.**  $N^1,N^2$ -bis(1,2,3,4-tetrahydroacridin-9-yl)ethane-1,2-diamine (**10.a**).

$N^1,N^3$ -bis(1,2,3,4-tetrahydroacridin-9-yl)propane-1,3-diamine **10.b**. Yellow solid, m.p. 89-95 °C.  $^1\text{H}$  NMR (300 MHz,  $\text{CDCl}_3$ ):  $\delta$  1.78-1.93 (8H, m, H-2,3), 2.02 (2H, p,  $J$  = 6.8 Hz, H-2'), 2.61 (4H, t,  $J$  = 6.1 Hz, H-1), 3.04 (4H, t,  $J$  = 6.1 Hz, H-4), 3.60 (4H, t,  $J$  = 6.8 Hz, H-1'), 7.31 (2H, ddd,  $J$  = 8.3, 6.7 and 1.3 Hz, H-7), 7.55 (2H, ddd,  $J$  = 8.3; 6.7 and 1.3 Hz, H-6), 7.87 (2H, dd,  $J$  = 8.6 and 1.3 Hz, H-5), 7.91 (2H, dd,  $J$  = 8.6 and 1.3 Hz, H-8).  $^{13}\text{C}$  NMR (75 MHz,  $\text{CDCl}_3$ ):  $\delta$  22.7 (C-2), 22.9 (C-3), 24.9 (C-1), 33.3 (C-2'), 33.9 (C-4), 46.9 (C-1'), 116.6 (C-9a), 120.2 (C-8a), 122.4 (C-5), 124.0 (C-7), 128.5 (C-6), 128.7 (C-8), 147.3 (C-10a), 150.3 (C-9), 158.5 (C-4a). HRMS-ESI [ $m/z$ ]: Calculated for  $\text{C}_{29}\text{H}_{33}\text{N}_4$  [ $\text{M}+\text{H}$ ] $^+$ : 437.2700; Determined 437.2689.

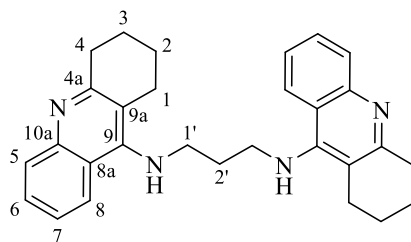

**Figure S21.**  $N^1,N^3$ -bis(1,2,3,4-tetrahydroacridin-9-yl)propane-1,3-diamine (**10.b**).

$N^1,N^4$ -bis(1,2,3,4-tetrahydroacridin-9-yl)butane-1,4-diamine **10.c**. Pale brown solid, m.p. 117-120 °C.  $^1\text{H}$  NMR (300 MHz,  $\text{CD}_3\text{OD}$ ):  $\delta$  1.67 (4H, broad s, H-2'), 1.75-1.88 (8H, m, H-2,3), 2.57 (4H, t,  $J$  = 5.9 Hz, H-1), 2.92 (4H, t,  $J$  = 6.1 Hz, H-4), 3.55 (4H, t,  $J$  = 6.2 Hz, H-1'), 7.29 (2H, ddd,  $J$  = 8.5, 6.8 and 1.3 Hz, H-7), 7.55 (2H, ddd,  $J$  = 8.5, 6.8 and 1.3 Hz, H-6), 7.74 (2H, dd,  $J$  = 8.5 and 1.1 Hz, H-5), 8.01 (2H, dd,  $J$  = 8.5 and 1.3 Hz, H-8).  $^{13}\text{C}$  NMR (75 MHz,  $\text{CD}_3\text{OD}$ ):  $\delta$  22.0 (C-2), 22.5 (C-3), 24.6 (C-1), 27.9 (C-2'), 32.2 (C-4), 47.5 (C-1'), 114.9 (C-9a), 119.3 (C-8a), 123.0 (C-8), 123.5 (C-7), 125.7 (C-5), 128.8 (C-6), 145.4 (C-10a), 151.9 (C-9), 156.7 (C-4a). HRMS-ESI [ $m/z$ ]: Calculated for  $\text{C}_{30}\text{H}_{35}\text{N}_4$  [ $\text{M}+\text{H}$ ] $^+$ : 451.2856; Determined 451.2848.

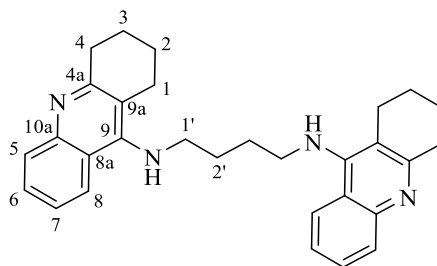

**Figure S22.** *N*<sup>1</sup>,*N*<sup>4</sup>-bis(1,2,3,4-tetrahydroacridin-9-yl)butane-1,4-diamine (**10.c**).

*N*<sup>1</sup>,*N*<sup>5</sup>-bis(1,2,3,4-tetrahydroacridin-9-yl)pentane-1,5-diamine **10.d**. Brown oil. <sup>1</sup>H NMR (300 MHz, CD<sub>3</sub>OD): δ 1.33-1.47 (2H, m, H-3'), 1.62 (4H, p, *J* = 7.6 Hz, H-2',4'), 1.79-1.94 (8H, m, H-2,3), 2.67 (4H, t, *J* = 5.8 Hz, H-1), 2.95 (4H, t, *J* = 6.0 Hz, H-4), 3.48 (4H, t, *J* = 7.1 Hz, H-1',5'), 7.32 (2H, ddd, *J* = 8.4, 6.8 and 1.3 Hz, H-7), 7.54 (2H, ddd, *J* = 8.4, 6.8 and 1.3 Hz, H-6), 7.76 (2H, dd, *J* = 8.4 and 1.3 Hz, H-5), 8.04 (2H, dd, *J* = 8.4 and 1.3 Hz, H-8). <sup>13</sup>C NMR (75 MHz, CD<sub>3</sub>OD): δ 22.2 (C-3), 22.7 (C-2), 23.8 (C-3'), 24.7 (C-1), 30.5 (C-2',4'), 32.6 (C-4), 48.1 (C-1',5'), 115.3 (C-9a), 119.8 (C-8a), 123.0 (C-8), 123.4 (C-7), 126.3 (C-5), 128.5 (C-6), 146.2 (C-10a), 151.9 (C-9), 157.5 (C-4a). HRMS-ESI [*m/z*]: Calculated for C<sub>31</sub>H<sub>37</sub>N<sub>4</sub> [*M*+H]<sup>+</sup>: 465.3013; Determined: 465.3030.

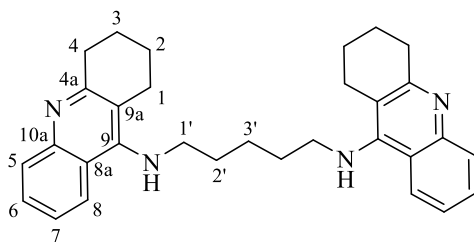

**Figure S23.** *N*<sup>1</sup>,*N*<sup>5</sup>-bis(1,2,3,4-tetrahydroacridin-9-yl)pentane-1,5-diamine (**10.d**).

*N*<sup>1</sup>,*N*<sup>8</sup>-bis(1,2,3,4-tetrahydroacridin-9-yl)octane-1,8-diamine **10.e**. Amber oil. <sup>1</sup>H NMR (300 MHz, CDCl<sub>3</sub>): δ 1.27-1.42 (8H, m, H-3',4',5',6'), 1.66 (4H, p, *J* = 7.1 Hz, H-2',7'), 1.90 (4H, p, *J* = 3.1 Hz, H-2,3), 2.65-2.71 (4H, m, H-1), 3.03-3.13 (4H, t, *J* = 6.1 Hz, H-4), 3.52 (2H, t, *J* = 7.2 Hz, H-1',8'), 7.34 (1H, dd, *J* = 8.5, 6.8 and 1.3 Hz, H-7), 7.42 (1H, dd, *J* = 8.5, 6.9 and 1.3 Hz, H-6), 7.55 (1H, dd, *J* = 8.5 and 1.3 Hz, H-5), 7.97 (1H, dd, *J* = 8.5 and 1.3 Hz, H-8). <sup>13</sup>C NMR (75 MHz, CDCl<sub>3</sub>): δ 22.5 (C-2), 22.9 (C-3), 24.7 (C-1), 26.8-29.2 (C-3',4',5',6'), 31.7 (C-2',7'), 33.3 (C-4), 49.3 (C-1',8'), 115.2 (C-9a), 119.7 (C-8a), 123.0 (C-8), 123.7 (C-7), 127.7 (C-5), 128.7 (C-6), 146.4 (C-10a), 151.3 (C-9), 157.5 (C-4a). HRMS-ESI [*m/z*]: Calculated for C<sub>34</sub>H<sub>43</sub>N<sub>4</sub> [*M*+H]<sup>+</sup>: 507.3482; Determined: 507.3561.

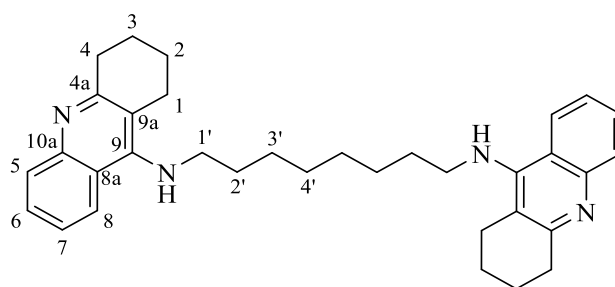

**Figure S24.** *N*<sup>1</sup>,*N*<sup>8</sup>-bis(1,2,3,4-tetrahydroacridin-9-yl)octane-1,8-diamine (**10.e**).

*N*<sup>1</sup>,*N*<sup>10</sup>-bis(1,2,3,4-tetrahydroacridin-9-yl)decane-1,10-diamine **10.f**. Ambar oil. <sup>1</sup>H NMR (300 MHz, (CD<sub>3</sub>)<sub>2</sub>CO): δ 1.17-1.41 (16H, m, H-3',4',5',6',7',8'), 1.64 (8H, p, *J* = 7.1 Hz, H-2',9'), 1.87 (8H, p, *J* = 3.2 Hz, H-2,3), 2.74-2.84 (4H, m, H-1), 2.93-3.00 (4H, m, H-4), 3.48 (4H, q, *J* = 6.7 Hz, H-1',8'), 4.82 (2H, broad s, NH), 7.34 (2H, ddd, *J* = 8.4, 6.7 and 1.4 Hz, H-7), 7.52 (2H, ddd, *J* = 8.4, 6.8 and 1.4 Hz, H-6), 7.81 (2H, dd, *J* = 8.4 and 1.2 Hz, H-5), 8.12 (2H, dd, *J* = 8.4 and 1.3 Hz, H-8). <sup>13</sup>C NMR (75 MHz, (CD<sub>3</sub>)<sub>2</sub>CO): δ 22.8 (C-2), 23.1 (C-3), 25.0 (C-1), 26.7 (C-3',8'), 28.7-29.5 (C-4',5',6',7'), 31.1 (C-2',9'), 33.9 (C-4), 48.8 (C-1',10'), 116.2 (C-9a), 120.6 (C-8a), 123.0 (C-8), 123.2 (C-7), 127.7 (C-6), 128.8 (C-5), 147.7 (C-10a), 150.7 (C-9), 158.1 (C-4a). HRMS-ESI [*m/z*]: Calculated for C<sub>36</sub>H<sub>47</sub>N<sub>4</sub> [*M*+H]<sup>+</sup>: 535.3795; Determined: 535.3809.

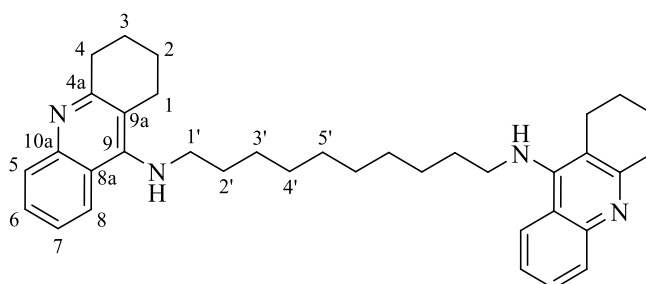

**Figure S25.** *N*<sup>1</sup>,*N*<sup>10</sup>-bis(1,2,3,4-tetrahydroacridin-9-yl)decane-1,10-diamine (**10.f**).

*N*<sup>1</sup>,*N*<sup>12</sup>-bis(1,2,3,4-tetrahydroacridin-9-yl)dodecane-1,12-diamine **10.g**. Ambar oil. <sup>1</sup>H NMR (300 MHz, CD<sub>3</sub>OD): δ 1.13-1.30 (12H, m, H-4',5',6',7',8',9'), 1.24-1.39 (4H, m, H-2',11'), 1.62 (4H, p, *J* = 7.9 and 7.1 Hz, H-3',10'), 1.91 (8H, p; *J* = 3.1 Hz, H-2,3), 2.75 (4H, broad s, H-4), 2.97 (4H, broad s, H-1), 3.54 (4H, t, *J* = 7.2 Hz, H-1',12'), 7.36 (2H, ddd, *J* = 8.4, 6.8 and 1.3 Hz, H-7), 7.55 (2H, ddd, *J* = 8.4, 6.8 and 1.4 Hz, H-6), 7.77 (2H, dd, *J* = 8.4 and 1.2 Hz, H-5), 8.10 (2H, dd, *J* = 8.4 and 1.3 Hz, H-8). <sup>13</sup>C NMR (75 MHz, CD<sub>3</sub>OD): δ 22.3 (C-3), 22.7 (C-2), 24.7 (C-4), 26.4 (C-2',11'), 28.9 (C-4',9'), 29.0 (C-5',8'), 29.1 (C-6',7'), 30.8 (C-3',10'), 32.6 (C-1), 48.3 (C-1',12'), 115.2 (C-9a), 119.8 (C-8a), 123.1 (C-8), 123.3 (C-7), 126.3 (C-5), 128.4 (C-6), 146.3 (C-10a), 152.0 (C-9), 157.4 (C-4a). HRMS-ESI [*m/z*]: Calculated for C<sub>38</sub>H<sub>51</sub>N<sub>4</sub> [*M*+H]<sup>+</sup>: 563.4108; Determined: 563.4095.

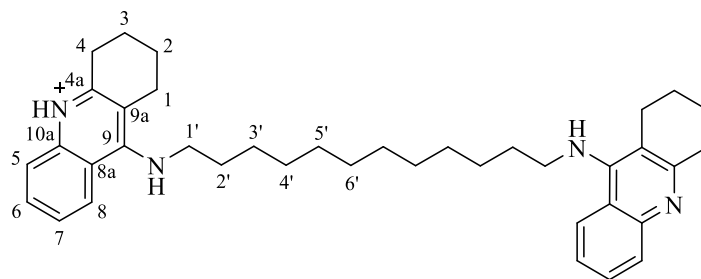

**Figure S26.**  $N^1,N^{12}$ -bis(1,2,3,4-tetrahydroacridin-9-yl)dodecane-1,12-diamine (**10.g**).

$N^1,N^2$ -bis(6-chloro-1,2,3,4-tetrahydroacridin-9-yl)ethane-1,2-diamine **10.h**, White solid, m.p. 176-178 °C.  $^1\text{H}$  NMR (500 MHz,  $\text{CD}_3\text{OD}$ ):  $\delta$  1.63-1.70 (4H, m, H-2), 1.74-1.81 (4H, m, H-3), 2.29 (4H, t,  $J$  = 6.4 Hz, H-4), 2.82 (4H, t,  $J$  = 6.5 Hz, H-1), 3.88 (4H, s, H-1'), 7.16 (2H, dd,  $J$  = 9.1 and 2.2 Hz, H-7), 7.65 (2H, d,  $J$  = 2.2 Hz, H-5), 7.77 (2H, d,  $J$  = 9.1 Hz, H-8).  $^{13}\text{C}$  NMR (125 MHz,  $\text{CD}_3\text{OD}$ ):  $\delta$  23.4 (C-3), 23.7 (C-2), 26.2 (C-4), 34.0 (C-1), 50.3 (C-1'), 116.4 (C-9a), 118.8 (C-8a), 124.9 (C-7), 125.8 (C-5), 126.5 (C-8), 135.4 (C-6), 148.1 (C-10a), 152.5 (C-9), 160.0 (C-4a). HRMS-ESI  $[m/z]$ : Calculated for  $\text{C}_{28}\text{H}_{29}\text{Cl}_2\text{N}_4$   $[M+H]^+$ : 491.1764; Determined: 491.1750.

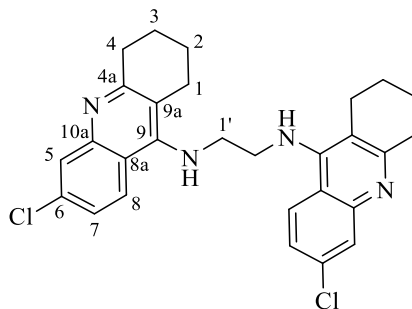

**Figure S27.**  $N^1,N^2$ -bis(6-chloro-1,2,3,4-tetrahydroacridin-9-yl)ethane-1,2-diamine (**10.h**).

$N^1,N^3$ -bis(6-chloro-1,2,3,4-tetrahydroacridin-9-yl)propane-1,3-diamine **10.i**. Brown solid, m.p. 89-95 °C.  $^1\text{H}$  NMR (300 MHz,  $\text{CD}_3\text{OD}$ ):  $\delta$  1.68-1.84 (8H, m, H-2,3), 2.07 (2H, p,  $J$  = 5.9 Hz, H-2'), 2.43 (4H, t,  $J$  = 5.8 Hz, H-4), 2.78 (4H, t,  $J$  = 6.0 Hz, H-1), 3.69 (4H, t,  $J$  = 5.9 Hz, H-1',3'), 7.17 (2H, dd,  $J$  = 9.1 and 2.2 Hz, H-7), 7.63 (2H, d,  $J$  = 2.2 Hz, H-5), 7.85 (2H, d,  $J$  = 9.1 Hz, H-8).  $^{13}\text{C}$  NMR (75 MHz,  $\text{CD}_3\text{OD}$ ):  $\delta$  21.8 (C-3), 22.2 (C-2), 24.4 (C-4), 32.0 (C-1), 32.6 (C-2'), 44.9 (C-1'), 114.2 (C-9a), 116.8 (C-8a), 123.4 (C-7), 124.7 (C-5), 125.2 (C-8), 134.2 (C-6), 146.1 (C-10a), 152.1 (C-9), 157.5 (C-4a). HRMS-ESI  $[m/z]$ : Calculated for  $\text{C}_{29}\text{H}_{31}\text{Cl}_2\text{N}_4$   $[M+H]^+$ : 505.1920; Determined: 505.1898.

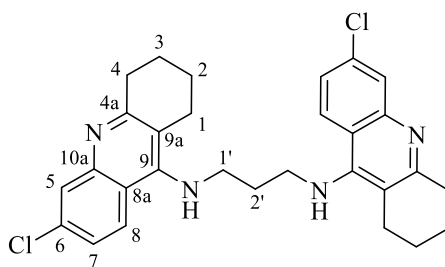

**Figure S28.** *N*<sup>1</sup>,*N*<sup>3</sup>-bis(6-chloro-1,2,3,4-tetrahydroacridin-9-yl)propane-1,3-diamine (**10.i**)

*N*<sup>1</sup>,*N*<sup>4</sup>-bis(6-chloro-1,2,3,4-tetrahydroacridin-9-yl)butane-1,4-diamine **10.j**. White solid, m.p. 170-178 °C. <sup>1</sup>H NMR (300 MHz, DMSO-*d*<sub>6</sub>): δ 1.54 (4H, broad s, H-2'), 1.66-1.82 (8H, m, H-2,3), 2.53 (4H, t, *J* = 6.0 Hz, H-1), 2.85 (4H, t, *J* = 6.0 Hz, H-4), 3.42 (4H, broad s, H-1), 5.88 (2H, broad s, NH), 7.27 (2H, dd, *J* = 9.1 and 2.3 Hz, H-7), 7.69 (2H, d, *J* = 2.3 Hz, H-5), 8.07 (2H, d, *J* = 9.1 Hz, H-8). <sup>13</sup>C NMR (75.47 MHz, (DMSO-*d*<sub>6</sub>): δ 22.4 (C-2), 22.8 (C-3), 25.3 (C-1), 28.0 (C-2'), 33.1 (C-4), 47.6 (C-1'), 115.6 (C-9a), 118.3 (C8a), 124.0 (C-7), 126.0 (C-5; 8), 133.5 (C-6), 146.7 (C-10a), 151.3 (C-9), 158.5 (C-4a). HRMS-ESI [*m/z*]: Calculated for C<sub>30</sub>H<sub>33</sub>Cl<sub>2</sub>N<sub>4</sub> [*M*+*H*]<sup>+</sup>: 519.2077; Determined 519.2064.

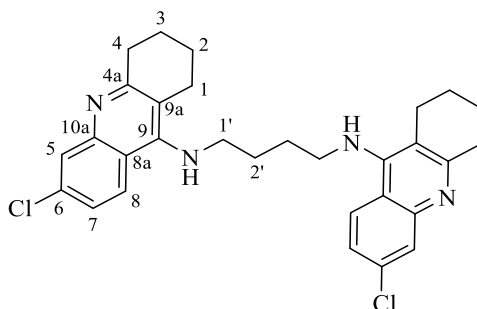

**Figure S29.** *N*<sup>1</sup>,*N*<sup>4</sup>-bis(6-chloro-1,2,3,4-tetrahydroacridin-9-yl)butane-1,4-diamine (**10.j**).

*N*<sup>1</sup>,*N*<sup>5</sup>-bis(6-chloro-1,2,3,4-tetrahydroacridin-9-yl)pentane-1,5-diamine **10.k**. Brown oil. <sup>1</sup>H NMR (300 MHz, CDCl<sub>3</sub>): δ 1.44-1.55 (2H, m, H-3'), 1.69 (4H, p, *J* = 7.3 Hz, H-2',4'), 1.90 (8H, p, *J* = 3.4 Hz, H-2,3), 2.60-2.69 (4H, m, H-4), 2.98-3.08 (4H, m, H-1), 3.48 (4H, t, *J* = 7.2 Hz, H-1',5'), 7.27 (2H, dd, *J* = 9.1 and 2.2 Hz, H-7), 7.86 (2H, d, *J* = 9.1 Hz, H-8), 7.90 (2H, d, *J* = 2.2 Hz, H-5). <sup>13</sup>C NMR (75 MHz, CDCl<sub>3</sub>): δ 22.6 (C-3), 22.9 (C-2), 24.3 (C-4), 24.6 (C-3'), 31.5 (C-2',4'), 33.9 (C-1), 49.3 (C-1',5'), 116.0 (C-9a), 118.4 (C-8a), 124.4 (C-7), 124.4 (C-8), 127.45 (C-5), 134.2 (C-6), 147.9 (C-10a), 150.7 (C-9), 159.5 (C-4a). HRMS-ESI [*m/z*]: Calculated for C<sub>32</sub>H<sub>35</sub>Cl<sub>2</sub>N<sub>4</sub> [*M*+*H*]<sup>+</sup>: 533.2233; Determined 533.2225.



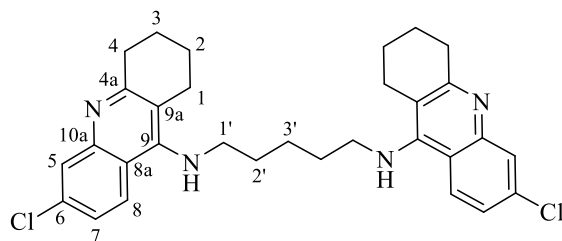

**Figure S30.** *N*<sup>1</sup>,*N*<sup>5</sup>-bis(6-chloro-1,2,3,4-tetrahydroacridin-9-yl)pentane-1,5-diamine (**10.k**).

*N*<sup>1</sup>,*N*<sup>8</sup>-bis(6-chloro-1,2,3,4-tetrahydroacridin-9-yl)octane-1,8-diamine **10.l**. Brown oil. <sup>1</sup>H NMR (300 MHz, CD<sub>3</sub>OD): δ 1.21-1.35 (8H, m, H-2',4',5',7'), 1.61 (4H, p, *J* = 7.1 Hz, H-3',6'), 1.86-1.94 (4H, m, H-2,3), 2.64-2.72 (2H, m, H-1), 2.91-2.99 (2H, m, H-4), 3.55 (4H, t, *J* = 7.2 Hz, H-1',8'), 7.30 (2H, dd, *J* = 9.1 and 2.2 Hz, H-7), 7.71 (2H, d, *J* = 2.2 Hz, H-5), 8.08 (2H, d, *J* = 9.1 Hz, H-8). <sup>13</sup>C NMR (75 MHz, CD<sub>3</sub>OD): δ 23.4 (C-3), 23.8 (C-2), 25.9 (C-4), 27.6 (C-4',5'), 30.1 (C-2',7'), 32.0 (C-3',6'), 33.7 (C-1), 48.9 (C-1',8'), 116.3 (C-9a), 119.0 (C-8a), 125.1 (C-7), 125.8 (C-8), 126.8 (C-5), 136.0 (C-6), 147.7 (C-10a), 153.8 (C-9), 159.4 (C-4a). HRMS-ESI [*m/z*]: Calculated for C<sub>34</sub>H<sub>41</sub>Cl<sub>2</sub>N<sub>4</sub> [*M*+H]<sup>+</sup>: 575.2703; Determined 575.2692.

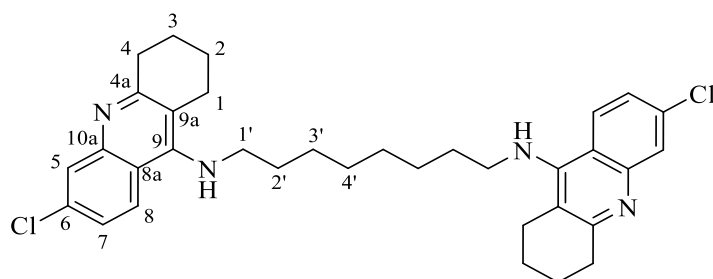

**Figure S31.** *N*<sup>1</sup>,*N*<sup>8</sup>-bis(6-chloro-1,2,3,4-tetrahydroacridin-9-yl)octane-1,8-diamine (**10.l**).

*N*<sup>1</sup>,*N*<sup>10</sup>-bis(6-chloro-1,2,3,4-tetrahydroacridin-9-yl)decane-1,10-diamine **10.m**. Brown oil. <sup>1</sup>H NMR (300 MHz, CD<sub>3</sub>OD): δ 1.14-1.37 (8H, m, H-4',5',6',7'), 1.62 (4H, p, *J* = 7.1 Hz, H-3',8'), 1.91 (8H, p, *J* = 3.7 Hz, H-2,3), 2.68-2.76 (4H, m, H-4), 2.92-3.00 (4H, m, H-1), 3.56 (4H, t, *J* = 7.1 Hz, H-1',10'), 7.31 (2H, dd, *J* = 9.1 and 2.2 Hz, H-7), 7.74 (2H, d, *J* = 2.2 Hz, H-5), 8.09 (2H, d, *J* = 9.1 Hz, H-8). <sup>13</sup>C NMR (75 MHz, CD<sub>3</sub>OD): δ 22.1 (C-3), 22.6 (C-2), 24.6 (C-4), 26.3 (C-2',9'), 28.7-28.8 (C-4',5',6',7'), 30.7 (C-3',8'), 32.7 (C-1), 48.2 (C-1',10'), 115.2 (C-9a), 118.0 (C-8a), 123.6 (C-7), 125.0 (C-5), 125.2 (C-8), 134.2 (C-6), 147.0 (C-10a), 152.1 (C-9), 158.7 (C-4a). HRMS-ESI [*m/z*]: Calculated for C<sub>36</sub>H<sub>45</sub>Cl<sub>2</sub>N<sub>4</sub> [*M*+H]<sup>+</sup>: 603.3016; Determined: 603.3014.

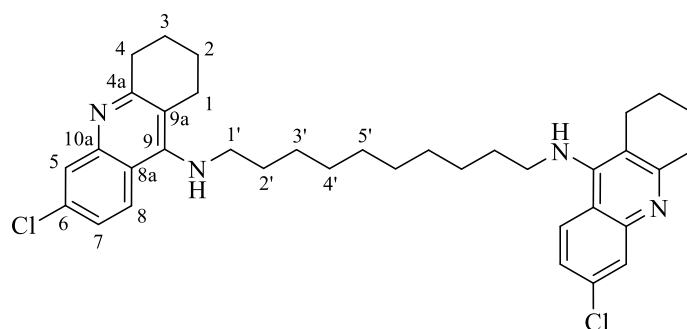

**Figure S32.**  $N^1,N^{10}$ -bis(6-chloro-1,2,3,4-tetrahydroacridin-9-yl)decane-1,10-diamine (**10.m**).

$N^1,N^{12}$ -bis(6-chloro-1,2,3,4-tetrahydroacridin-9-yl)dodecane-1,12-diamine **10.n**. Brown oil.  $^1\text{H}$  NMR (500 MHz,  $\text{CD}_3\text{OD}$ ):  $\delta$  1.23-1.29 (4H, m, H-4',9'), 1.30-1.39 (4H, m, H-2',11'), 1.65 (4H, p,  $J = 7.2$  Hz, H-3',10'), 1.93 (8H, p,  $J = 3.3$  Hz, H-2,3), 2.71-2.76 (4H, m, H-4), 2.95-3.00 (4H, m, H-1), 3.58 (4H, t,  $J = 7.1$  Hz, H-1',12'), 7.33 (2H, dd,  $J = 9.1$  and  $2.2$  Hz, H-7), 7.75 (2H, d,  $J = 2.2$  Hz, H-5), 8.11 (2H, d,  $J = 9.1$  Hz, H-8).  $^{13}\text{C}$  NMR (125 MHz,  $\text{CD}_3\text{OD}$ ):  $\delta$  22.2 (C-3), 22.6 (C-2), 24.6 (C-4), 26.3 (C-2',11'), 28.8 (C-4',9'), 29.0 (C-5',8'), 29.0 (C-6',7'), 30.8 (C-3',10'), 32.8 (C-1), 48.2 (C-1',12'), 115.3 (C-9a), 118.0 (C-8a), 123.6 (C-7), 125.1 (C-5), 125.2 (C-8), 134.2 (C-6), 147.1 (C-10a), 152.1 (C-9), 158.8 (C-4a). HRMS-ESI  $[m/z]$ : Calculated for  $\text{C}_{38}\text{H}_{49}\text{Cl}_2\text{N}_4$   $[M+H]^+$ : 631.3329; Determined: 631.3345.

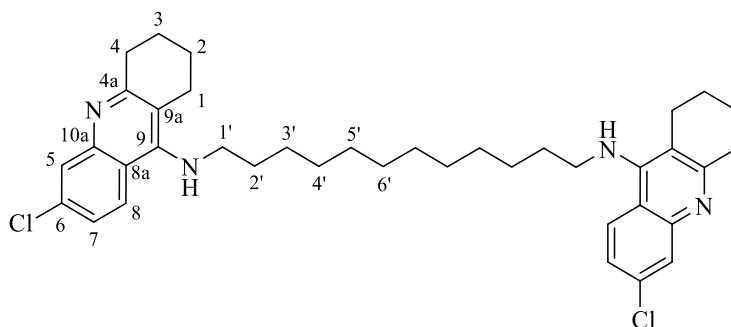

**Figure S33.**  $N^1,N^{12}$ -bis(6-chloro-1,2,3,4-tetrahydroacridin-9-yl)dodecane-1,12-diamine (**10.n**).

**General procedure for the synthesis of *N*-acetylated-9-alkylamino-1,2,3,4-tetrahydroacridines (7.a-n):**

*\*Derivative 7.a as example of NMR spectra.*

*N*-{2-[(1,2,3,4-tetrahydroacridin-9-yl)amino]ethyl}acetamide **7.a**, Yellow oil.  $^1\text{H}$  NMR (300 MHz,  $\text{CD}_3\text{OD}$ ):  $\delta$  1.88-1.97 (4H, m, H-2,3), 1.93 (3H, s,  $\text{CH}_3$ ), 2.75 (2H, broad s, H-1), 2.99 (2H, broad s, H-4), 3.46 (2H, t,  $J = 6.1$  Hz, H-2'), 3.73 (2H, t,  $J = 6.1$  Hz, H-1'), 7.41 (1H, ddd,  $J = 8.4, 6.8$  and  $1.3$  Hz, H-7), 7.60 (1H, ddd,  $J = 8.4, 6.8$  and  $1.3$  Hz, H-6), 7.77 (1H, dd,  $J = 8.4$  and  $1.3$  Hz, H-5), 8.15 (1H, dd,  $J = 8.4$  and  $1.3$  Hz, H-8).  $^{13}\text{C}$  NMR (75 MHz,  $\text{CD}_3\text{OD}$ ):  $\delta$  21.1 ( $\text{CH}_3$ -amide), 22.0 (C-2), 22.5 (C-3), 24.6 (C-1), 32.1 (C-4), 39.9 (C-2'), 48.3 (C-1'), 105.0 (C-9a), 119.2 (C-8a), 123.2 (C-8), 123.7 (C-7), 125.4 (C-5), 129.0 (C-6), 145.2 (C-10a), 152.3 (C-9), 156.7 (C-4a), 172.9 (C=O). HRMS-ESI [ $m/z$ ]: Calculated for  $\text{C}_{17}\text{H}_{22}\text{N}_3\text{O}$  [ $\text{M}+\text{H}$ ] $^+$ : 284.1757; Determined: 284.1768.

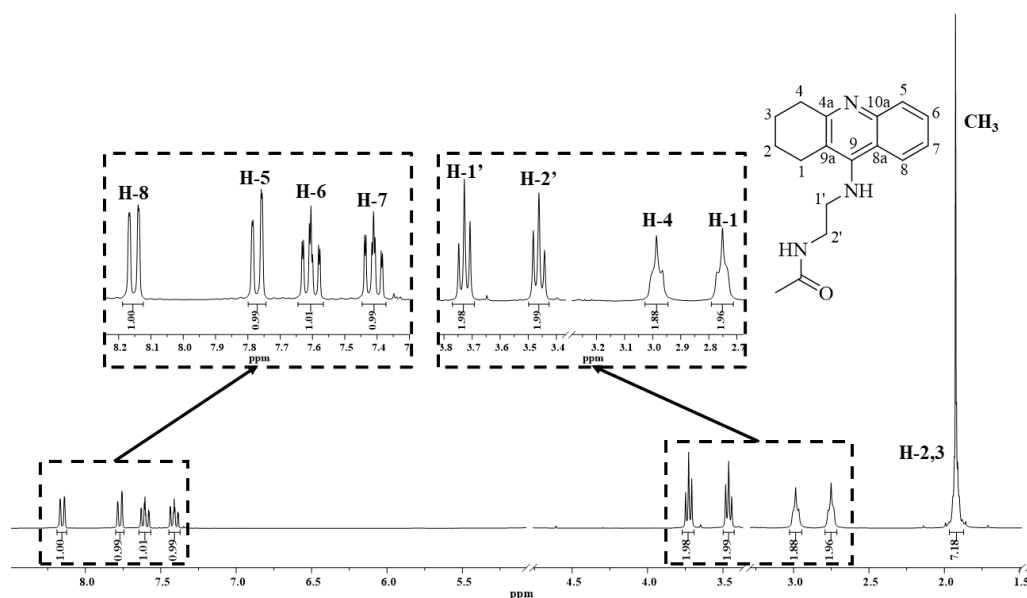

**Figure S34.**  $^1\text{H}$  NMR *N*-{2-[(1,2,3,4-tetrahydroacridin-9-yl)amino]ethyl}acetamide (**7.a**).

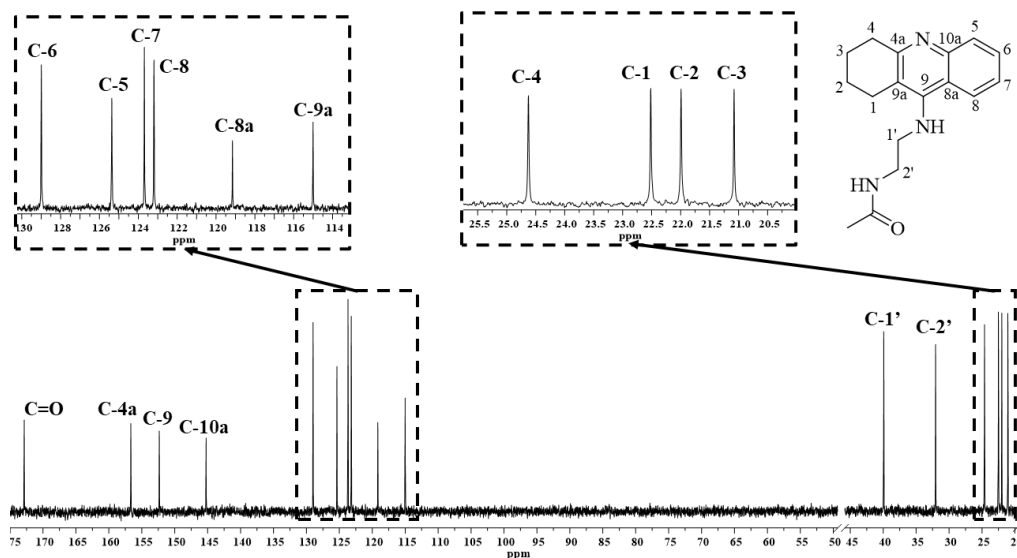

**Figure S35.**  $^{13}\text{C}$  NMR *N*-2-[(1,2,3,4-tetrahydroacridin-9-yl)amino]ethyl]acetamide (**7.a**).

*N*-3-[(1,2,3,4-tetrahydroacridin-9-yl)amino]propyl]acetamide **7.b**. Ambar oil.  $^1\text{H}$  NMR (500 MHz,  $\text{CD}_3\text{OD}$ ):  $\delta$  1.95 (3H, s,  $\text{CH}_3$ ), 1.96-2.03 (4H, m, H-2,3), 1.99-2.03 (2H, m, H-2'), 2.77 (2H, t,  $J$  = 5.8 Hz, H-1), 3.04 (2H, t,  $J$  = 5.9 Hz, H-4), 3.34 (2H, t,  $J$  = 6.5 Hz, H-3'), 3.97 (2H, t,  $J$  = 6.7 Hz, H-1'), 7.60 (1H, ddd,  $J$  = 8.5, 6.8 and 1.4 Hz, H-7), 7.79 (1H, dd,  $J$  = 8.5 and 1.4 Hz, H-5), 7.85 (1H, ddd,  $J$  = 8.5, 6.8 and 1.2 Hz, H-6), 8.39 (1H, dd,  $J$  = 8.5 and 1.1 Hz, H-8).  $^{13}\text{C}$  NMR (125 MHz,  $\text{CD}_3\text{OD}$ ):  $\delta$  20.5 ( $\text{CH}_3$ -amide), 21.1 (C-2), 21.7 (C-3), 23.6 (C-1), 28.1 (C-4), 30.2 (C-2'), 35.8 (C-3'), 44.6 (C-1'), 111.9 (C-9a), 115.9 (C-8a), 119.2 (C-5), 124.9 (C-7), 124.9 (C-8), 132.5 (C-6), 138.8 (C-10a), 150.8 (C-9), 156.5 (C-4a), 172.6 (C=O). HRMS-ESI  $[\text{m/z}]$ : Calculated for  $\text{C}_{18}\text{H}_{24}\text{N}_3\text{O}$   $[\text{M}+\text{H}]^+$ : 298.1914; Determined: 298.1919.

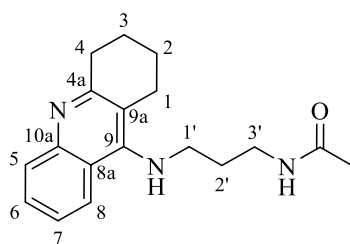

**Figure S36.** *N*-3-[(1,2,3,4-tetrahydroacridin-9-yl)amino]propyl]acetamide (**7.b**).

*N*-4-[(1,2,3,4-tetrahydroacridin-9-yl)amino]butyl]acetamide **7.c**. Ambar oil.  $^1\text{H}$  NMR (300 MHz,  $\text{CD}_3\text{OD}$ ):  $\delta$  1.62 (2H, p,  $J$  = 6.9 Hz, H-2'), 1.85 (2H, p,  $J$  = 6.9 Hz, H-3'), 1.92 (3H, s,  $\text{CH}_3$ ), 1.98 (4H, p,  $J$  = 3.1 Hz, H-2,3), 2.69-2.77 (2H, m, H-4), 2.99-3.07 (2H, m, H-1), 3.21 (2H, t,  $J$  = 7.0 Hz, H-4'), 3.95 (2H, t,  $J$  = 7.2 Hz, H-1'), 7.59 (1H, ddd,  $J$  = 8.5, 6.5 and 1.3 Hz, H-7), 7.80 (1H, dd,  $J$  = 8.5 and 1.3 Hz, H-5), 7.83 (1H, ddd,  $J$  = 8.5, 6.5 and 1.3 Hz, H-6), 8.38 (1H, dd,  $J$  = 8.5 and 1.3 Hz, H-8).  $^{13}\text{C}$  NMR (75 MHz,  $\text{CD}_3\text{OD}$ ):  $\delta$  20.6 (C-3), 21.2 ( $\text{CH}_3$ -amide), 21.7 (C-2), 23.6 (C-4), 26.2 (C-2'), 27.5 (C-3'),

28.4 (C-1), 38.5 (C-4'), 47.3 (C-1'), 112.0 (C-9a), 116.1 (C-8a), 119.5 (C-5), 124.8 (C-8), 124.9 (C-7), 132.3 (C-6), 139.2 (C-10a), 151.1 (C-4a), 156.1 (C-9), 172.0 (C=O). HRMS-ESI [m/z]: Calculated for C<sub>19</sub>H<sub>26</sub>N<sub>3</sub>O [M+H]<sup>+</sup>: 312.2070; Determined: 312.2075.

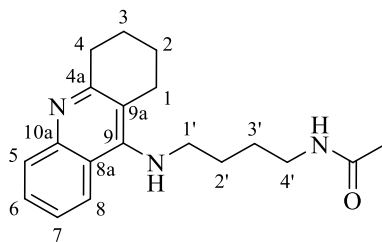

**Figure S37.** *N*-{4-[(1,2,3,4-tetrahydroacridin-9-yl)amino]butyl}acetamide (**7.c**).

*N*-{5-[(1,2,3,4-tetrahydroacridin-9-yl)amino]pentyl}acetamide **7.d**. Pale brown solid, m.p. 235-238 °C. <sup>1</sup>H NMR (300 MHz, CD<sub>3</sub>OD): δ 1.35-1.47 (2H, m, H-3'), 1.47-1.61 (2H, m, H-4'), 1.74 (2H, p, *J* = 7.5 Hz, H-2'), 1.87-2.00 (4H, m, H-2,3), 1.92 (3H, s, CH<sub>3</sub>-amide), 2.74 (2H, broad s, H-4), 2.99 (2H, broad s, H-1), 3.16 (2H, t, *J* = 6.9 Hz, H-5'), 3.70 (2H, t, *J* = 7.2 Hz, H-1'), 7.45 (1H, ddd, *J* = 8.4, 6.8 and 1.3 Hz, H-7), 7.67 (1H, ddd, *J* = 8.4, 6.8 and 1.3 Hz, H-6), 7.78 (1H, dd, *J* = 8.4 and 1.3 Hz, H-5), 8.21 (1H, dd, *J* = 8.4 and 1.2 Hz, H-8). <sup>13</sup>C NMR (75 MHz, CD<sub>3</sub>OD): δ 21.1 (CH<sub>3</sub>-amide), 21.6 (C-3), 22.3 (C-2), 23.8 (C-3'), 24.3 (C-4), 28.7 (C-4'), 30.2 (C-2'), 30.9 (C-1), 38.8 (C-5'), 48.0 (C-1'), 113.9 (C-9a), 118.3 (C-8a), 123.6 (C-5), 123.8 (C-8), 123.9 (C-7), 130.0 (C-6), 143.4 (C-10a), 153.6 (C-9), 154.9 (C-4a), 171.8 (C=O). HRMS-ESI [m/z]: Calculated for C<sub>20</sub>H<sub>28</sub>N<sub>3</sub>O [M+H]<sup>+</sup>: 326.2227; Determined: 326.2224.

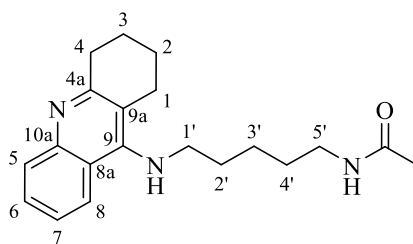

**Figure S38.** *N*-{5-[(1,2,3,4-tetrahydroacridin-9-yl)amino]pentyl}acetamide (**7.d**).

*N*-{8-[(1,2,3,4-tetrahydroacridin-9-yl)amino]octyl}acetamide **8.e**. Brown oil. <sup>1</sup>H NMR (300 MHz, CDCl<sub>3</sub>): δ 1.18-1.35 (8H, m, H-2',4',5',7'), 1.44 (2H, t, *J* = 6.9 Hz, H-6'), 1.64 (2H, p, *J* = 7.1 Hz, H-3'), 1.90 (4H, dt, *J* = 6.3 and 2.9 Hz, H-2,3), 1.95 (3H, s, CH<sub>3</sub>-amide), 2.69 (2H, broad s, H-4), 3.05 (2H, broad s, H-1), 3.10-3.28 (2H, m, H-8'), 3.49 (2H, t, *J* = 7.2 Hz, H-1'), 4.03 (1H, broad s, NH), 5.90 (1H, broad s, NH-amide), 7.33 (1H, ddd, *J* = 8.4, 6.8 and 1.3 Hz, H-7), 7.54 (1H, ddd, *J* = 8.4, 6.8 and 1.3 Hz, H-6), 7.91 (1H, d, *J* = 8.4 Hz, H-5), 7.96 (1H, d, *J* = 8.4 Hz, H-8). <sup>13</sup>C NMR (75 MHz, CDCl<sub>3</sub>): δ 22.6 (C-2), 22.9 (C-3), 23.3 (CH<sub>3</sub>-amide), 24.7 (C-4), 26.7 (C-2'), 26.7 (C-7'), 29.1 (C-5'), 29.1 (C-4'), 29.5 (C-6'), 31.7 (C-3'), 33.6 (C-1), 39.6 (C-8'), 49.4 (C-1'), 115.5 (C-9a), 119.9 (C-8a), 123.0 (C-8),

123.7 (C-7), 128.0 (C-5), 128.5 (C-6), 146.9 (C-10a), 151.2 (C-9), 157.9 (C-4a), 170.2 (C=O). HRMS-ESI [m/z]: Calculated for C<sub>23</sub>H<sub>34</sub>N<sub>3</sub>O [M+H]<sup>+</sup>: 368.2696; Determined: 368.2681.

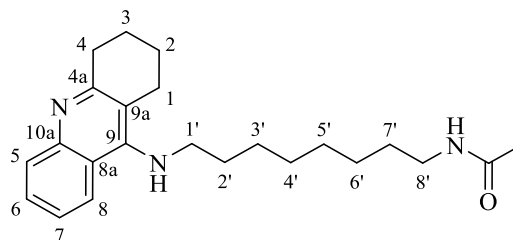

**Figure S39.** *N*-{8-[(1,2,3,4-tetrahydroacridin-9-yl)amino]octyl}acetamide (**7.e**).

*N*-{10-[(1,2,3,4-tetrahydroacridin-9-yl)amino]decyl}acetamide **7.f**. White solid, m.p. 57-65 °C. <sup>1</sup>H NMR (300 MHz, CD<sub>3</sub>OD): δ 1.25-1.41 (16H, m, H-2',4',5',6',7',9'), 1.48 (2H, p, *J* = 7.0 Hz, H-8'), 1.70 (2H, p, *J* = 7.5 Hz, H-3'), 1.91-1.96 (4H, m, H-2,3), 1.94 (3H, s, CH<sub>3</sub>-amide), 2.69-2.77 (2H, m, H-4), 2.98-3.06 (2H, m, H-1), 3.14 (2H, t, *J* = 7.1 Hz, H-10'), 3.67 (2H, t, *J* = 7.2 Hz, H-1'), 7.44 (1H, ddd, *J* = 8.5, 6.8 and 1.3 Hz, H-7), 7.65 (1H, ddd, *J* = 8.5, 6.8 and 1.3 Hz, H-6), 7.82 (1H, dd, *J* = 8.5 and 1.3 Hz, H-5), 8.19 (1H, dd, *J* = 8.5 and 1.3 Hz, H-8). <sup>13</sup>C NMR (75 MHz, CD<sub>3</sub>OD): δ 21.1 (CH<sub>3</sub>-amide), 21.7 (C-3), 22.4 (C-2), 24.3 (C-4), 26.4 (C-2'), 26.6 (C-9'), 28.9 (C-8'), 28.9-29.1 (C-4',5',6',7'), 30.6 (C-3'), 31.1 (C-1), 39.1 (C-10'), 48.1 (C-1'), 114.0 (C-9a), 118.5 (C-8a), 123.6 (C-8), 123.8 (C-7), 124.1 (C-5), 129.7 (C-6), 143.8 (C-4a), 153.4 (C-10a), 155.2 (C-9), 171.7 (C=O). HRMS-ESI [m/z]: Calculated for C<sub>25</sub>H<sub>38</sub>N<sub>3</sub>O [M+H]<sup>+</sup>: 396.3009; Determined: 396.3000.

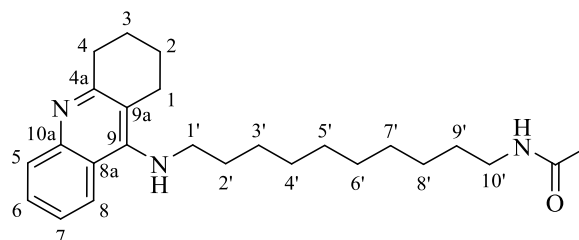

**Figure S40.** *N*-{10-[(1,2,3,4-tetrahydroacridin-9-yl)amino]decyl}acetamide (**7.f**).

*N*-{12-[(1,2,3,4-tetrahydroacridin-9-yl)amino]dodecyl}acetamide **7.g**. White solid, 55-63 °C. <sup>1</sup>H NMR (300 MHz, CD<sub>3</sub>OD): δ 1.21-1.40 (16H, m, H-2',4',5',6',7',8',9',11'), 1.48 (2H, p, *J* = 7.1 Hz, H-10'), 1.66 (2H, p, *J* = 7.2 Hz, H-3'), 1.94 (3H, s, CH<sub>3</sub>-amide), 1.88-1.95 (4H, m, H-2,3), 2.70-2.77 (2H, m, H-4), 2.96-3.03 (2H, m, H-1), 3.14 (2H, t, *J* = 7.1 Hz, H-12'), 3.60 (2H, t, *J* = 7.2 Hz, H-1'), 7.40 (1H, ddd, *J* = 8.5, 6.8 and 1.3 Hz, H-7), 7.60 (1H, ddd, *J* = 8.5, 6.8 and 1.3 Hz, H-6), 7.79 (1H, dd, *J* = 8.5 and 1.3 Hz, H-5), 8.14 (1H, dd, *J* = 8.5 and 1.3 Hz, H-8). <sup>13</sup>C NMR (75 MHz, CD<sub>3</sub>OD): δ 21.1 (CH<sub>3</sub>-amide), 22.0 (C-3), 22.5 (C-2), 24.5 (C-4), 26.5 (C-2'), 26.6 (C-11'), 28.9 (C-10'), 29.0-29.3 (C-4',5',6',7',8',9'), 30.8 (C-3'), 31.9 (C-1), 39.1 (C-12'), 48.2 (C-1'), 114.6 (C-9a), 119.1 (C-8a), 123.4 (C-8), 123.5 (C-7),

125.2 (C-5), 129.1 (C-6), 145.1 (C-10a), 152.7 (C-9), 156.3 (C-4a), 171.7 (C=O). HRMS-ESI [m/z]: Calculated for C<sub>27</sub>H<sub>42</sub>N<sub>3</sub>O [M+H]<sup>+</sup>: 424.3322; Determined: 424.3327.

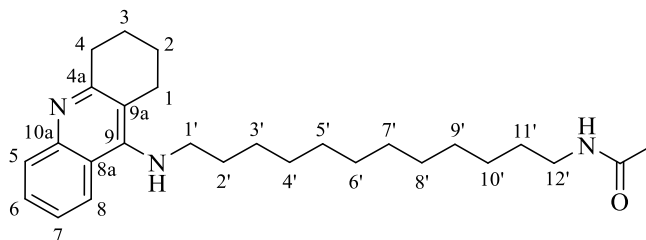

**Figure S41.** *N*-{12-[(1,2,3,4-tetrahydroacridin-9-yl)amino]dodecyl}acetamide (**7.g**).

*N*-{2-[(6-chloro-1,2,3,4-tetrahydroacridin-9-yl)amino]ethyl}acetamide **7.h**, Amber oil. <sup>1</sup>H NMR (300 MHz, CD<sub>3</sub>OD): δ 1.89-2.01 (4H, m, H-2,3), 1.95 (3H, s, CH<sub>3</sub>-amide), 2.68-2.78 (2H, m, H-4), 2.93-3.03 (2H, m, H-1), 3.51 (2H, t, *J* = 5.9 Hz, H-2'), 3.85 (2H, t, *J* = 5.9 Hz, H-1'), 7.42 (1H, dd, *J* = 9.2 and 2.2 Hz, H-7), 7.75 (1H, d, *J* = 2.2 Hz, H-5), 8.25 (1H, d, *J* = 9.2 Hz, H-8). <sup>13</sup>C NMR (75 MHz, CD<sub>3</sub>OD): δ 21.0 (CH<sub>3</sub>-amide), 21.5 (C-3), 22.1 (C-2), 24.2 (C-4), 31.0 (C-1), 39.7 (C-2'), 48.6 (C-1'), 114.3 (C-9a), 116.5 (C-8a), 122.4 (C-5), 124.4 (C-7), 125.9 (C-8), 135.8 (C-6), 144.1 (C-10a), 153.6 (C-9), 155.9 (C-4a), 173.2 (C=O). HRMS-ESI [m/z]: Calculated for C<sub>17</sub>H<sub>21</sub>ClN<sub>3</sub>O [M+H]<sup>+</sup>: 318.1368; Determined 318.1375.

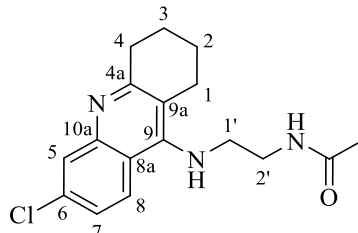

**Figure S42.** *N*-{2-[(6-chloro-1,2,3,4-tetrahydroacridin-9-yl)amino]ethyl}acetamide (**7.h**).

*N*-{3-[(6-chloro-1,2,3,4-tetrahydroacridin-9-yl)amino]propyl}acetamide **7.i**. White solid, m.p. 120-125 °C. <sup>1</sup>H NMR (300 MHz, CD<sub>3</sub>OD): δ 1.91 (2H, p, *J* = 6.7 Hz, H-2'), 1.93-1.96 (4H, m, H-2; 3), 1.96 (3H, s, CH<sub>3</sub>), 2.74 (2H, broad s, H-1), 3.01 (2H, broad s, H-4), 3.31 (2H, t, *J* = 6.6 Hz, H-3'), 3.76 (2H, t, *J* = 6.7 Hz, H-1'), 7.43 (1H, dd, *J* = 9.2 and 2.2 Hz, H-7), 7.78 (1H, d, *J* = 2.2 Hz, H-5), 8.22 (1H, d, *J* = 9.2 Hz, H-8). <sup>13</sup>C NMR (75 MHz, CD<sub>3</sub>OD): δ 21.1 (CH<sub>3</sub>-amide), 21.3 (C-2), 22.0 (C-3), 24.1 (C-1), 30.3 (C-2'), 30.4 (C-4), 36.0 (C-3'), 44.8 (C-1'), 113.9 (C-9a), 116.1 (C-8a), 121.6 (C-5), 124.6 (C-7), 126.0 (C-8), 136.3 (C-6), 143.1 (C-10a), 154.1 (C-9), 155.0 (C-4a). HRMS-ESI [m/z]: Calculated for C<sub>18</sub>H<sub>23</sub>ClN<sub>3</sub>O [M+H]<sup>+</sup>: 332.1524; Determined 332.1532.

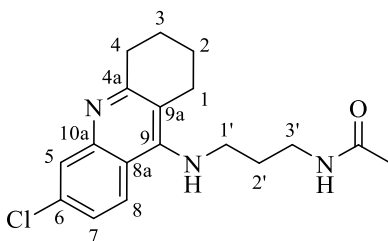

**Figure S43.** *N*-{3-[(6-chloro-1,2,3,4-tetrahydroacridin-9-yl)amino]propyl}acetamide (**7.i**).

*N*-{4-[(6-chloro-1,2,3,4-tetrahydroacridin-9-yl)amino]butyl}acetamide **7.j**. Ambar oil.  $^1\text{H}$  NMR (300 MHz,  $\text{CD}_3\text{OD}$ ):  $\delta$  1.54-1.66 (2H, m, H-2'), 1.73-1.85 (2H, m, H-3'), 1.92 (3H, s,  $\text{CH}_3$ ), 1.92-1.98 (4H, m, H-2,3), 2.68-2.75 (2H, m, H-4), 2.96-3.03 (2H, m, H-1), 3.20 (2H, t,  $J = 6.9$  Hz, H-4'), 3.81 (2H, t,  $J = 7.2$  Hz, H-1'), 7.46 (1H, dd,  $J = 9.2$  and  $2.2$  Hz, H-7), 7.76 (1H, d,  $J = 2.2$  Hz, H-5), 8.26 (1H, d,  $J = 9.2$  Hz, H-8).  $^{13}\text{C}$  NMR (75 MHz,  $\text{CD}_3\text{OD}$ ):  $\delta$  21.1 (C-3), 21.2 ( $\text{CH}_3$ -amide), 21.9 (C-2), 23.9 (C-4), 26.2 (C-2'), 27.6 (C-3'), 30.0 (C-1), 38.5 (C-4'), 47.6 (C-1'), 113.5 (C-9a), 115.7 (C-8a), 120.8 (C-5), 124.7 (C-7), 126.4 (C-8), 136.8 (C-6), 142.4 (C-10a), 154.1 (C-4a), 154.5 (C-9), 171.9 (C=O). HRMS-ESI [ $m/z$ ]: Calculated for  $\text{C}_{20}\text{H}_{27}\text{ClN}_3\text{O}$  [ $\text{M}+\text{H}$ ] $^+$ : 346.1681; Determined 346.1670.

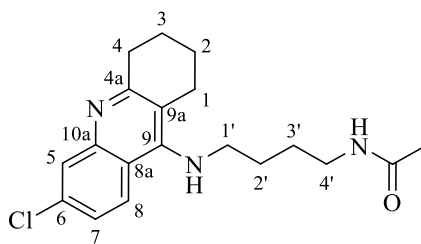

**Figure S44.** *N*-{4-[(6-chloro-1,2,3,4-tetrahydroacridin-9-yl)amino]butyl}acetamide (**7.j**).

*N*-{5-[(6-chloro-1,2,3,4-tetrahydroacridin-9-yl)amino]pentyl}acetamide **7.k**. Ambar oil.  $^1\text{H}$  NMR (300 MHz,  $\text{CD}_3\text{OD}$ ):  $\delta$  1.36-1.48 (2H, m, H-3'), 1.48-1.62 (2H, m, H-4'), 1.68-1.85 (2H, m, H-2'), 1.91-1.97 (7H, m, H-2,3, $\text{CH}_3$ ), 2.71 (2H, broad s, H-1), 3.00 (2H, broad s, H-4), 3.17 (2H, t,  $J = 6.9$  Hz, H-5'), 3.73 (2H, t,  $J = 7.2$  Hz, H-1'), 7.42 (1H, dd,  $J = 9.2$  and  $2.2$  Hz, H-7), 7.77 (1H, d,  $J = 2.2$  Hz, H-5), 8.21 (1H, d,  $J = 9.2$  Hz, H-8).  $^{13}\text{C}$  NMR (75 MHz,  $\text{CD}_3\text{OD}$ ):  $\delta$  21.1 (C-2), 21.4 (C-3), 22.1 ( $\text{CH}_3$ -amide), 23.7 (C-1), 24.1 (C-3'), 28.7 (C-4'), 30.1 (C-2'), 30.7 (C-4), 38.8 (C-5), 48.0 (C-1'), 113.9 (C-9a), 116.3 (C-8a), 122.1 (C-5), 124.4 (C-7), 126.0 (C-8), 136.0 (C-6), 143.7 (C-4a), 153.8 (C-10a), 155.4 (C-9), 171.8 (C=O). HRMS-ESI [ $m/z$ ]: Calculated for  $\text{C}_{22}\text{H}_{31}\text{ClN}_3\text{O}$  [ $\text{M}+\text{H}$ ] $^+$ : 360.1837; Determined 360.1812.



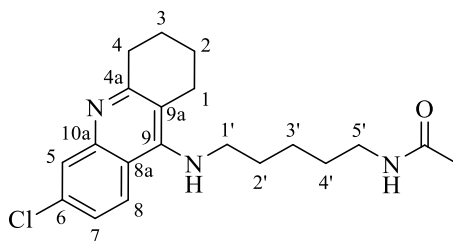

**Figure S45.** *N*-[5-[(6-chloro-1,2,3,4-tetrahydroacridin-9-yl)amino]pentyl]acetamide (**7.k**).

*N*-[8-[(6-chloro-1,2,3,4-tetrahydroacridin-9-yl)amino]octyl]acetamide **7.l**. Brown oil.  $^1\text{H}$  NMR (300 MHz,  $\text{CDCl}_3$ ):  $\delta$  1.17-1.39 (8H, m, H-2',4',5',7'), 1.44 (2H, t,  $J$  = 7.0 Hz, H-6'), 1.64 (2H, p,  $J$  = 7.1 Hz, H-3'), 1.89 (4H, p,  $J$  = 3.1 Hz, H-2,3), 1.96 (3H, s,  $\text{CH}_3$ -amide), 2.64 (2H, broad s, H-4), 3.03 (2H, broad s, H-1), 3.19 (2H, q,  $J$  = 6.7 Hz, H-8'), 3.49 (2H, t,  $J$  = 7.2 Hz, H-1'), 4.13 (1H, broad s, NH), 5.83 (1H, broad s, NH-amide), 7.25 (1H, dd,  $J$  = 9.3 and 2.2 Hz, H-7), 7.89 (1H, s, H-5), 7.90 (1H, d,  $J$  = 9.3 Hz, H-8).  $^{13}\text{C}$  NMR (75 MHz,  $\text{CDCl}_3$ ):  $\delta$  22.5 (C-3), 22.8 (C-2), 23.3 ( $\text{CH}_3$ -amide), 24.5 (C-4), 26.7 (C-2'; 7'), 29.1 (C-5'), 29.1 (C-4'), 29.5 (C-6'), 31.7 (C-3'), 33.6 (C-1), 39.6 (C-8'), 49.4 (C-1'), 115.3 (C-9a), 118.0 (C-8a), 124.3 (C-7), 124.8 (C-8), 126.8 (C-5), 134.3 (C-6), 147.4 (C-10a), 151.2 (C-9), 159.0 (C-4a), 170.2 (C=O). HRMS-ESI [ $m/z$ ]: Calculated for  $\text{C}_{25}\text{H}_{37}\text{ClN}_3\text{O}$  [ $\text{M}+\text{H}$ ] $^+$ : 402.2307; Determined 402.2310.

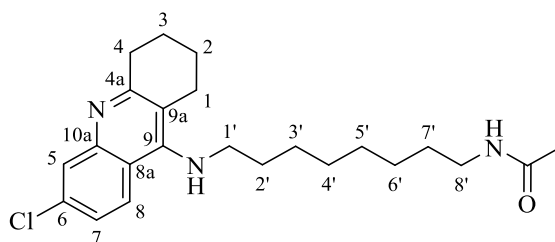

**Figure S46.** *N*-[8-[(6-chloro-1,2,3,4-tetrahydroacridin-9-yl)amino]octyl]acetamide (**7.l**).

*N*-[10-[(6-chloro-1,2,3,4-tetrahydroacridin-9-yl)amino]decyl]acetamide **7.m**. Brown oil.  $^1\text{H}$  NMR (300 MHz,  $\text{CD}_3\text{OD}$ ):  $\delta$  1.23-1.39 (12H, m, H-2',4',5',6',7',9'), 1.48 (2H, p,  $J$  = 7.3 Hz, H-8'), 1.67 (2H, p,  $J$  = 7.4 Hz, H-3'), 1.90-1.96 (4H, m, H-2,3), 1.93 (3H, s,  $\text{CH}_3$ -amide), 2.69-2.76 (2H, m, H-4), 2.94-3.02 (2H, m, H-1), 3.14 (2H, t,  $J$  = 7.1 Hz, H-10'), 3.61 (2H, t,  $J$  = 7.2 Hz, H-1), 7.35 (1H, dd,  $J$  = 9.1 and 2.2 Hz, H-7), 7.75 (1H, d,  $J$  = 2.2 Hz, H-5), 8.14 (1H, d,  $J$  = 9.1 Hz, H-8).  $^{13}\text{C}$  NMR (75 MHz,  $\text{CD}_3\text{OD}$ ):  $\delta$  21.1 (C-3), 22.0 (C-2), 22.5 ( $\text{CH}_3$ -amide), 24.5 (C-4), 26.4 (C-2'), 26.6 (C-9'), 28.9 (C-8'), 28.9-29.3 (C-4',5',6',7'), 30.7 (C-3'), 32.3 (C-1), 39.1 (C-10'), 48.2 (C-1'), 114.9 (C-9a), 117.6 (C-8a), 123.8 (C-7), 124.4 (C-5), 125.4 (C-8), 134.6 (C-6), 148.3 (C-10a), 152.5 (C-9), 158.0 (C-4a), 171.7 (C=O). HRMS-ESI [ $m/z$ ]: Calculated for  $\text{C}_{27}\text{H}_{41}\text{ClN}_3\text{O}$  [ $\text{M}+\text{H}$ ] $^+$ : 430.2620; Determined 430.2627.

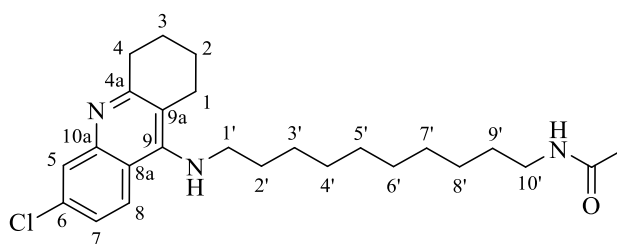

**Figure S47.** *N*-[10-[(6-chloro-1,2,3,4-tetrahydroacridin-9-yl)amino]decyl]acetamide (**7.m**).

*N*-[12-[(6-chloro-1,2,3,4-tetrahydroacridin-9-yl)amino]dodecyl]acetamide **7.n**. Brown oil.  $^1\text{H}$  NMR (300 MHz,  $\text{CD}_3\text{OD}$ ):  $\delta$  1.16-1.37 (16H, m, H-2',4',5',6',7',8',9',11'), 1.47 (2H, p,  $J$  = 7.2 Hz, H-10'), 1.63 (2H, p,  $J$  = 7.2 Hz, H-3'), 1.85-1.92 (4H, m, H-2,3), 1.94 (3H, s,  $\text{CH}_3$ -amide), 2.67 (2H, broad s, H-1), 2.94 (2H, broad s, H-4), 3.14 (2H, t,  $J$  = 7.1 Hz, H-12'), 3.54 (2H, t,  $J$  = 7.2 Hz, H-1'), 7.28 (1H, dd,  $J$  = 9.2 and 2.2 Hz, H-7), 7.71 (1H, d,  $J$  = 2.2 Hz, H-5), 8.06 (1H, d,  $J$  = 9.2 Hz, H-8).  $^{13}\text{C}$  NMR (75 MHz,  $\text{CD}_3\text{OD}$ ):  $\delta$  21.2 ( $\text{CH}_3$ -amide), 22.0 (C-2), 22.5 (C-3), 24.5 (C-1), 26.4 (C-2'), 26.6 (C-11'), 28.9 (C-10'), 29.0-29.3 (C4',5',6',7',8',9'), 30.8 (C-3'), 32.4 (C-4), 39.1 (C-12'), 48.3 (C-1'), 114.9 (C-9a), 117.6 (C-8a), 123.7 (C-7), 124.5 (C-5), 125.3 (C-8), 134.5 (C-6), 146.4 (C-10a), 152.3 (C-9), 158.0 (C-4a), 171.7 (C=O). HRMS-ESI [ $m/z$ ]: Calculated for  $\text{C}_{29}\text{H}_{45}\text{ClN}_3\text{O}$  [ $\text{M}+\text{H}$ ] $^+$ : 458.2933; Determined 458.2941.

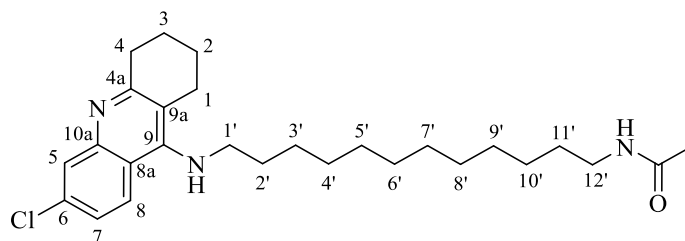

**Figure S48.** *N*-[12-[(6-chloro-1,2,3,4-tetrahydroacridin-9-yl)amino]dodecyl]acetamide (**7.n**).

## Synthesis of *N*-formylated-9-alkylamino-1,2,3,4-tetrahydroacridine (8.a-f):

*\*Derivative 8.a as example of NMR spectra.*

*N*-{8-[(1,2,3,4-tetrahydroacridin-9-yl)amino]octyl}formamide **8.a**, Pale brown oil, yield 43 %.  $^1\text{H}$  NMR (300 MHz,  $\text{CD}_3\text{OD}$ ):  $\delta$  1.24-1.40 (8H, m, H-2',4',5',7'), 1.48 (2H, p,  $J = 7.1$  Hz, H-6'), 1.65 (2H, p,  $J = 7.3$  Hz, H-3'), 1.93 (4H, p,  $J = 3.3$  Hz, H-2,3), 2.73-2.80 (2H, m, H-4), 2.96-3.03 (2H, m, H-1), 3.19 (2H, dt,  $J = 7.1$  and 0.8 Hz, H-8'), 3.55 (2H, t,  $J = 7.2$  Hz, H-1'), 7.38 (1H, ddd,  $J = 8.4, 6.8$  and 1.3 Hz, H-7), 7.57 (1H, ddd,  $J = 8.4, 6.8$  and 1.4 Hz, H-6), 7.78 (1H, dd,  $J = 8.4$  and 1.2 Hz, H-5), 8.02 (1H, s, CHO), 8.11 (1H, dd,  $J = 8.4$  and 1.3 Hz, H-8).  $^{13}\text{C}$  NMR (75 MHz,  $\text{CD}_3\text{OD}$ ):  $\delta$  22.3 (C-3), 22.7 (C-2), 24.8 (C-4), 26.3 (C-2'), 26.4 (C-7'), 28.8 (C-6'), 28.9 (C-4',5'), 30.8 (C-3'), 32.7 (C-1), 37.5 (C-8'), 48.3 (C-1'), 115.3 (C-9a), 119.9 (C-8a), 123.0 (C-8), 123.3 (C-7), 126.4 (C-5), 128.4 (C-6), 146.4 (C-10a), 152.0 (C-9), 157.6 (C-4a), 162.3 (CHO). HRMS-ESI [ $m/z$ ]: Calculated for  $\text{C}_{22}\text{H}_{32}\text{N}_3\text{O}$  [ $\text{M}+\text{H}$ ] $^+$ : 354.2540; Determined: 354.2582.

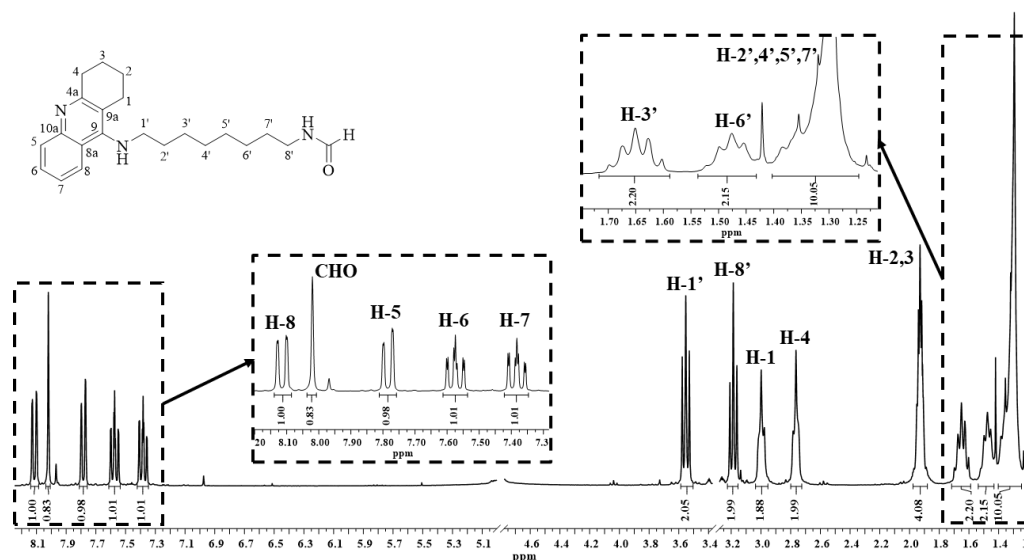

**Figure S49.**  $^1\text{H}$  NMR spectrum of *N*-{8-[(1,2,3,4-tetrahydroacridin-9-yl)amino]octyl}formamide (**8.a**).

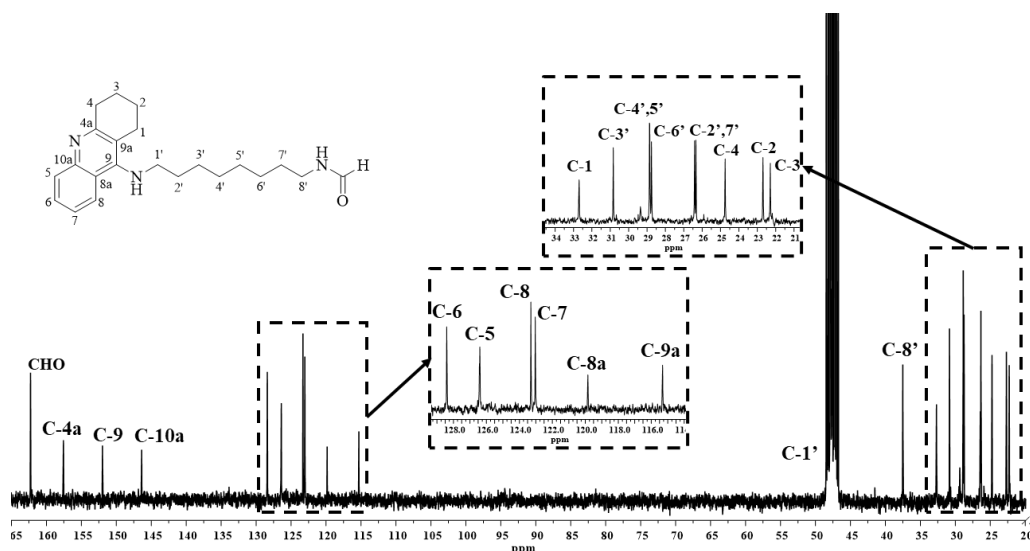

**Figure S50.**  $^1\text{H}$  NMR spectrum of *N*-[8-[(1,2,3,4-tetrahydroacridin-9-yl)amino]octyl]formamide (**8.a**).

*N*-[10-[(1,2,3,4-tetrahydroacridin-9-yl)amino]decyl]formamide **8.b**. Pale brown oil, yield 88 %.  $^1\text{H}$  NMR (300 MHz,  $\text{CD}_3\text{OD}$ ):  $\delta$  1.23-1.40 (12H, m, H-2',4',5',6',7',9'), 1.50 (2H, p,  $J$  = 7.3 Hz, H-8'), 1.65 (2H, p,  $J$  = 7.1 Hz, H-3'), 1.93 (4H, p,  $J$  = 3.3 Hz, H-2,3), 2.73-2.80 (2H, m, H-4), 2.97-3.04 (2H, m, H-1), 3.20 (2H, t,  $J$  = 7.0 Hz, H-10'), 3.56 (2H, t,  $J$  = 7.2 Hz, H-1'), 7.38 (1H, ddd,  $J$  = 8.4, 6.8 and 1.3 Hz, H-7), 7.58 (1H, ddd,  $J$  = 8.4, 6.8 and 1.3 Hz, H-6), 7.79 (1H, dd,  $J$  = 8.5 and 1.3 Hz, H-5), 8.03 (1H, s, CHO), 8.12 (1H, dd,  $J$  = 8.5 and 1.3 Hz, H-8).  $^{13}\text{C}$  NMR (75 MHz,  $\text{CD}_3\text{OD}$ ):  $\delta$  22.3 (C-3), 22.7 (C-2), 24.8 (C-4), 26.5 (C-2'), 26.5 (C-9'), 28.9 (C-8'), 28.9-29.1 (C-4',5',6',7'), 30.9 (C-3'), 32.7 (C-1), 37.5 (C-10'), 48.3 (C-1'), 115.3 (C-9a), 119.8 (C-8a), 123.1 (C-8), 123.3 (C-7), 126.4 (C-5), 128.4 (C-6), 146.4 (C-10a), 152.0 (C-9), 157.5 (C-4a), 162.3 (CHO). HRMS-ESI [ $m/z$ ]: Calculated for  $\text{C}_{24}\text{H}_{36}\text{N}_3\text{O}$  [ $\text{M}+\text{H}$ ] $^+$ : 382.2853; Determined: 382.2862.

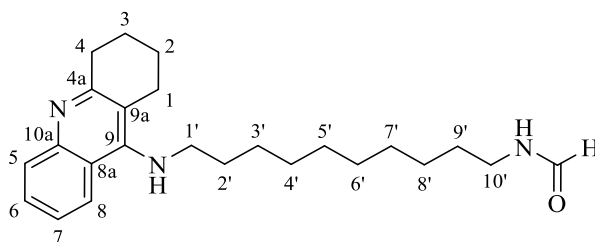

**Figure S51.** *N*-[10-[(1,2,3,4-tetrahydroacridin-9-yl)amino]decyl]formamide (**8.b**).

*N*-[12-[(1,2,3,4-tetrahydroacridin-9-yl)amino]dodecyl]formamide **8.c**. Pale brown oil, yield 56 %.  $^1\text{H}$  NMR (300 MHz,  $\text{CD}_3\text{OD}$ ):  $\delta$  1.22-1.40 (16H, m, H-2',4',5',6',7',8',9',11'), 1.51 (2H, p,  $J$  = 7.0 Hz, H-10'), 1.65 (2H, p,  $J$  = 7.1 Hz, H-3'), 1.93 (4H, p,  $J$  = 3.3 Hz, H-2,3), 2.72-2.81 (2H, m, H-4), 2.96-3.03 (2H, m, H-1), 3.21 (2H, t,  $J$  = 7.0 Hz, H-12'), 3.56 (2H, t,  $J$  = 7.2 Hz, H-1'), 7.39 (1H, ddd,  $J$  = 8.4, 6.8

and 1.3 Hz, H-7), 7.58 (1H, ddd,  $J = 8.4, 6.8$  and  $1.4$  Hz, H-6), 7.79 (1H, dd,  $J = 8.5$  and  $1.3$  Hz, H-5), 8.03 (1H, s, CHO), 8.12 (1H, dd,  $J = 8.5$  and  $1.3$  Hz, H-8).  $^{13}\text{C}$  NMR (75 MHz,  $\text{CD}_3\text{OD}$ ):  $\delta$  22.3 (C-3), 22.7 (C-2), 24.7 (C-4), 26.5 (C-11'), 26.5 (C-2'), 28.9 (C-10'), 28.9-29.2 (C-4',5',6',7',8',9'), 30.9 (C-3'), 32.6 (C-1), 37.6 (C-12'), 48.3 (C-1'), 115.2 (C-9a), 119.8 (C-8a), 123.1 (C-8), 123.3 (C-7), 126.3 (C-5), 128.5 (C-6), 146.3 (C-10a), 152.1 (C-9), 157.4 (C-4a), 162.3 (CHO). HRMS-ESI [ $m/z$ ]: Calculated for  $\text{C}_{26}\text{H}_{40}\text{N}_3\text{O}$  [ $M+H$ ] $^+$ : 410.3166; Determined: 410.3192.

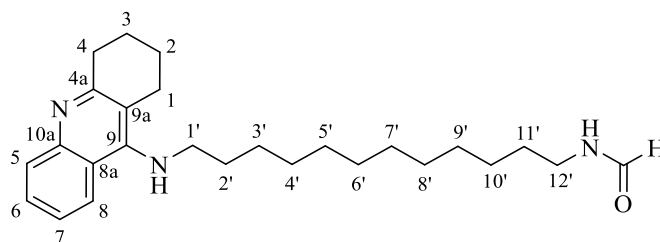

**Figure S52.** *N*-{12-[(1,2,3,4-tetrahydroacridin-9-yl)amino]dodecyl}formamide (**8.c**).

*N*-{8-[(6-chloro-1,2,3,4-tetrahydroacridin-9-yl)amino]octyl}formamide **8.d**, Pale brown oil, yield 40 %.  $^1\text{H}$  NMR (300 MHz,  $\text{CD}_3\text{OD}$ ):  $\delta$  1.24-1.38 (8H, m, H-2',4',5',7'), 1.47 (2H, p,  $J = 7.0$  Hz, H-6'), 1.64 (2H, p,  $J = 7.4$  Hz, H-3'), 1.90 (4H, p,  $J = 3.3$  Hz, H-2,3), 2.70 (2H, broad s, H-1), 2.96 (2H, broad s, H-4), 3.18 (2H, t,  $J = 7.1$  Hz, H-8'), 3.54 (2H, t,  $J = 7.2$  Hz, H-1'), 7.30 (1H, dd,  $J = 9.2$  and  $2.2$  Hz, H-7), 7.73 (1H, d,  $J = 2.2$  Hz, H-5), 8.02 (1H, s, CHO), 8.07 (1H, d,  $J = 9.2$  Hz, H-8).  $^{13}\text{C}$  NMR (75 MHz,  $\text{CD}_3\text{OD}$ ):  $\delta$  22.1 (C-2), 22.5 (C-3), 24.6 (C-1), 26.4 (C-2',7'), 28.8 (C-6'), 28.9 (C-4',5'), 30.8 (C-3'), 32.7 (C-4), 37.5 (C-8'), 48.3 (C-1'), 115.2 (C-9a), 117.9 (C-8a), 123.6 (C-7), 125.0 (C-5), 125.2 (C-8), 134.2 (C-6), 146.9 (C-10a), 152.0 (C-9), 158.6 (C-4a), 162.3 (CHO). HRMS-ESI [ $m/z$ ]: Calculated for  $\text{C}_{22}\text{H}_{30}\text{ClN}_3\text{O}$  [ $M+H$ ] $^+$ : 388.2150; Determined: 388.2162.

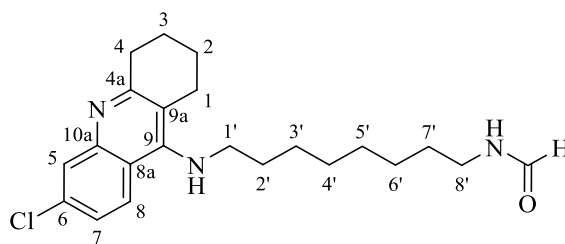

**Figure S53.** *N*-{8-[(6-chloro-1,2,3,4-tetrahydroacridin-9-yl)amino]octyl}formamide (**8.d**).

*N*-{10-[(6-chloro-1,2,3,4-tetrahydroacridin-9-yl)amino]decyl}formamide **8.e**, Pale brown oil, yield 45 %.  $^1\text{H}$  NMR (300 MHz,  $\text{CD}_3\text{OD}$ ):  $\delta$  1.21-1.41 (12H, m, H-2',4',5',6',7',9'), 1.52 (2H, p,  $J = 7.0$  Hz, H-8'), 1.65 (2H, p,  $J = 7.2$  Hz, H-3'), 1.92 (4H, p,  $J = 3.3$  Hz, H-2,3), 2.70-2.77 (2H, m, H-4), 2.95-3.01 (2H, m, H-1), 3.18-3.25 (2H, t,  $J = 6.9$  Hz, H-10'), 3.57 (2H, t,  $J = 7.1$  Hz, H-1'), 7.33 (1H, dd,  $J = 9.1$  and  $2.2$  Hz, H-7), 7.75 (1H, d,  $J = 2.2$  Hz, H-5), 8.03 (1H, s, CHO), 8.11 (1H, d,  $J = 9.1$  Hz, H-8).  $^{13}\text{C}$  NMR (75 MHz,  $\text{CD}_3\text{OD}$ ):  $\delta$  22.2 (C-3), 22.6 (C-2), 24.6 (C-4), 26.4 (C-2'), 26.5 (C-9'), 28.9 (C-8'), 28.9-29.2

(C-4',5',6',7'), 30.8 (C-3'), 32.8 (C-1), 37.6 (C-10'), 48.3 (C-1'), 115.3 (C-9a), 118.0 (C-8a), 123.6 (C-7), 125.1 (C-8), 125.2 (C-5), 134.2 (C-6), 147.1 (C-10a), 152.1 (C-9), 158.8 (C-4a), 162.3 (CHO). HRMS-ESI [m/z]: Calculated for C<sub>24</sub>H<sub>34</sub>ClN<sub>3</sub>O [M+H]<sup>+</sup>: 416.2463; Determined: 416.2491.

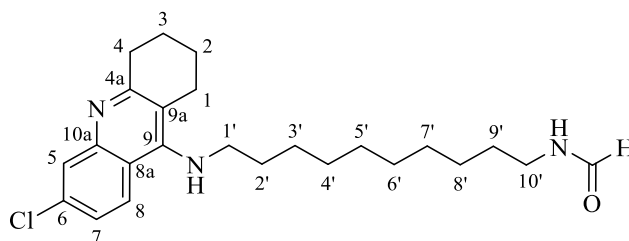

**Figure S54.** *N*-[10-[(6-chloro-1,2,3,4-tetrahydroacridin-9-yl)amino]decyl]formamide (**8.e**).

*N*-[12-[(6-chloro-1,2,3,4-tetrahydroacridin-9-yl)amino]dodecyl]formamide **8.f**. Pale brown oil, yield 57 %. <sup>1</sup>H NMR (300 MHz, CD<sub>3</sub>OD): δ 1.22-1.40 (16H, m, H-2',4',5',6',7',8',9',11'), 1.50 (2H, p, *J* = 7.0 Hz, H-10'), 1.65 (2H, p, *J* = 7.3 Hz, H-3'), 1.93 (4H, p, *J* = 3.3 Hz, H-2,3), 2.69-2.77 (2H, m, H-4), 2.94-3.02 (2H, m, H-1), 3.21 (2H, t, *J* = 7.0 Hz, H-12'), 3.58 (2H, t, *J* = 7.1 Hz, H-1'), 7.33 (1H, dd, *J* = 9.1 and 2.2 Hz, H-7), 7.75 (1H, d, *J* = 2.2 Hz, H-5), 8.03 (1H, s, CHO), 8.11 (1H, d, *J* = 9.1 Hz, H-8). <sup>13</sup>C NMR (75 MHz, CD<sub>3</sub>OD): δ 22.2 (C-3), 22.6 (C-2), 24.6 (C-4), 26.4 (C-11'), 26.5 (C-2'), 28.9 (C-10'), 28.9-29.1 (C-4',5',6',7',8',9'), 30.8 (C-3'), 32.8 (C-1), 37.5 (C-12'), 48.3 (C-1'), 115.3 (C-9a), 118.0 (C-8a), 123.6 (C-7), 125.1 (C-5), 125.2 (C-8), 134.2 (C-6), 147.1 (C-10a), 152.1 (C-9), 158.8 (C-4a), 162.3 (CHO). HRMS-ESI [m/z]: Calculated for C<sub>26</sub>H<sub>38</sub>ClN<sub>3</sub>O [M+H]<sup>+</sup>: 444.2776; Determined: 444.2804.

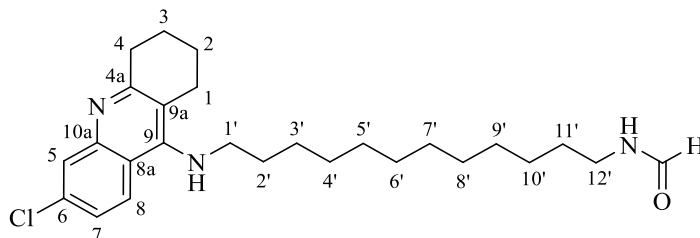

**Figure S55.** *N*-[12-[(6-chloro-1,2,3,4-tetrahydroacridin-9-yl)amino]dodecyl]formamide (**8.f**).

## Synthesis of compounds 9.a-d:

*\*Derivative 9.b as example of NMR spectra.*

2,5-bis({3-(1,2,3,4-tetrahydroacridin-9-yl)amino}propyl)amino)cyclohexa-2,5-diene-1,4-dione **9.a**. Pale brown oil, yield 34 %. <sup>1</sup>H NMR (500 MHz, (CD<sub>3</sub>OD): δ 1.93-1.97 (8H, m, H-2,3), 2.16 (4H, t, *J* = 6.6 Hz, H-2'), 2.69 (4H, broad s, H-4), 2.99 (4H, broad s, H-1), 3.35-3.38 (4H, m, H-3'), 4.05 (4H, t, *J* = 6.6 Hz, H-1'), 5.04 (2H, s, H-3''), 7.54 (2H, ddd, *J* = 8.5, 6.9 and 1.3 Hz, H-7), 7.73 (2H, dd, *J* = 8.5 and 1.3 Hz, H-5), 7.79 (2H, ddd, *J* = 8.5, 6.8 and 1.1 Hz, H-6), 8.32 (2H, d, *J* = 8.5 Hz, H-8) <sup>13</sup>C NMR (125 MHz, (CD<sub>3</sub>OD): δ 21.3 (C-2,3), 23.7 (C-4), 28.1 (C-1), 28.4 (C-2'), 39.3 (C-3'), 45.3 (C-1'), 91.8 (C-3''), 111.9 (C-9a), 115.7 (C-8a), 119.0 (C-5), 124.9 (C-7,8), 132.5 (C-6), 138.6 (C-10a), 150.7 (C-4a), 151.6 (C-2''), 156.5 (C-9), 177.5 (C-1''). HRMS-ESI [*m/z*]: Calculated for C<sub>38</sub>H<sub>43</sub>N<sub>6</sub>O<sub>2</sub> [*M*+H]<sup>+</sup>: 615.3442; Determined: 615.3428.

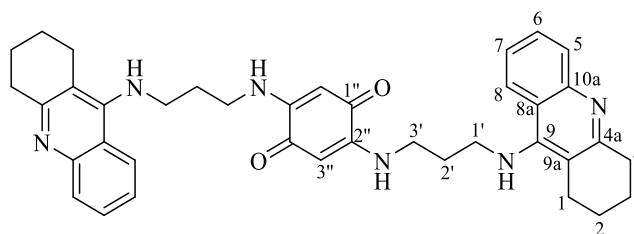

**Figure S56.** 2,5-bis({3-[(1,2,3,4-tetrahydroacridin-9-yl)amino]propyl}amino)cyclohexa-2,5-diene-1,4-dione (**9.a**).

2,5-dichloro-3,6-bis({3-[(1,2,3,4-tetrahydroacridin-9-yl)amino]propyl}amino)cyclohexa-2,5-diene-1,4-dione **9.b**. Light brown solid, m.p. 145-150 °C, yield 44 %. <sup>1</sup>H NMR (500 MHz, CD<sub>3</sub>OD): δ 1.93-1.97 (8H, m, H-2,3), 2.18 (4H, p, *J* = 6.5 Hz, H-2'), 2.70 (4H, broad s, H-4), 2.98 (4H, broad s, H-1), 3.95 (4H, t, *J* = 6.6 Hz, H-3'), 4.05 (4H, t, *J* = 6.4 Hz, H-1'), 4.64 (4H, broad s, NH), 7.51 (4H, t, *J* = 7.7 Hz, H-7), 7.70 (4H, d, *J* = 7.7 Hz, H-5), 7.76 (4H, t, *J* = 7.7 Hz, H-6), 8.30 (4H, d, *J* = 8.6 Hz, H-8). <sup>13</sup>C NMR (125 MHz, CD<sub>3</sub>OD): δ 20.6 (C-3), 21.7 (C-2), 23.8 (C-4), 28.5 (C-1), 31.1 (C-2'), 41.2 (C-3'), 44.8 (C-1'), 112.2 (C-9a), 116.0 (C-8a), 119.6 (C-5), 124.8 (C-7,8), 132.2 (C-6), 134.7 (C-3''), 139.3 (C-10a), 145.1 (C-2''), 151.3 (C-4a), 156.0 (C-9), 177.3 (C-1''). HRMS-ESI [*m/z*]: Calculated for C<sub>38</sub>H<sub>41</sub>Cl<sub>2</sub>N<sub>6</sub>O<sub>2</sub> [*M*+H]<sup>+</sup>: 683.2663; Determined 683.2692.

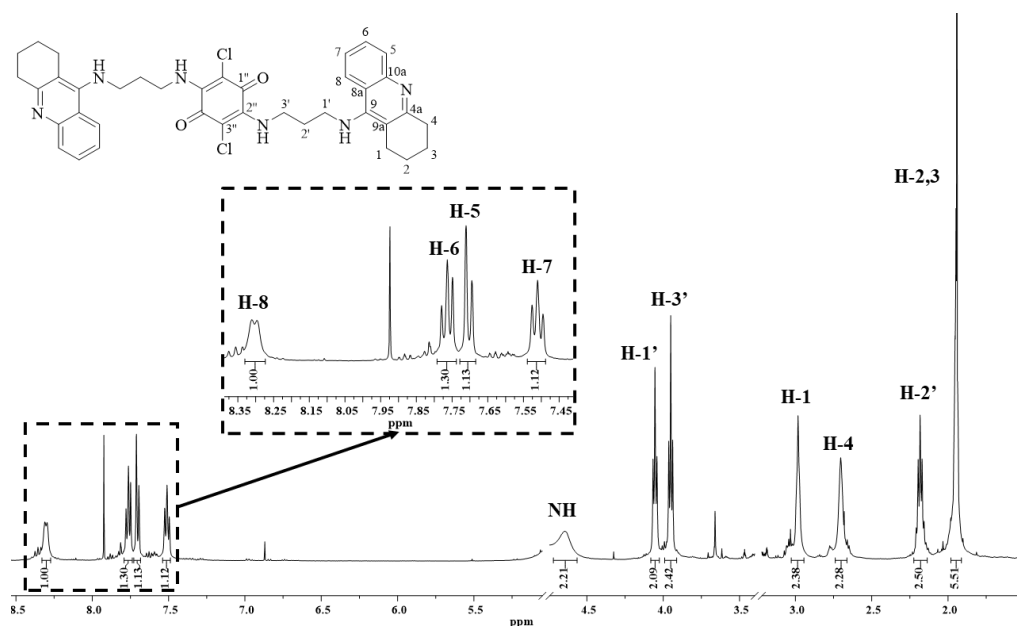

**Figure S57.**  $^1\text{H}$  NMR spectrum of 2,5-dichloro-3,6-bis({3-[(1,2,3,4-tetrahydroacridin-9-yl)amino]propyl}amino)cyclohexa-2,5-diene-1,4-dione (**9b**).

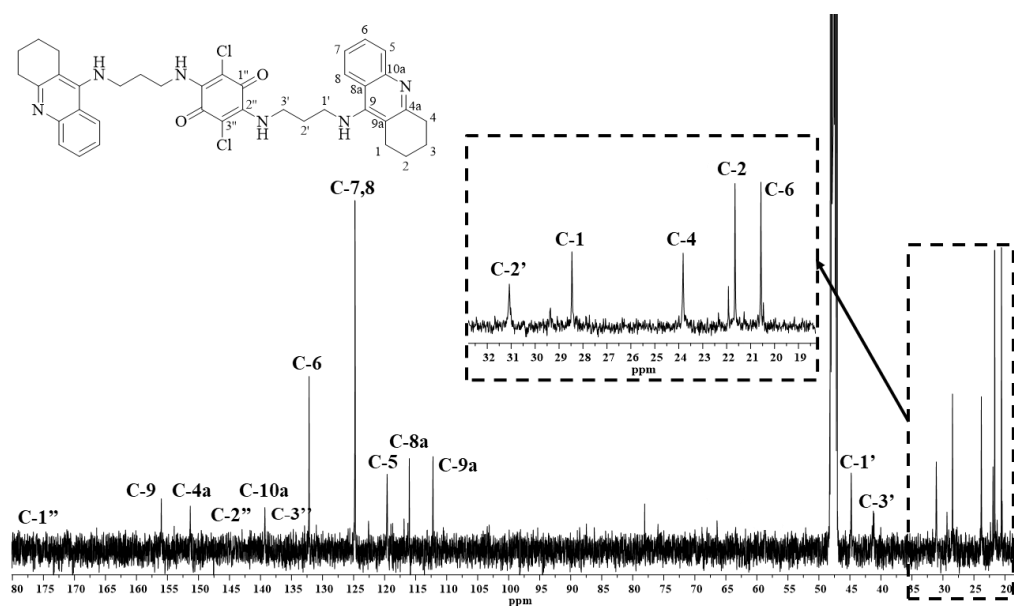

**Figure S58.**  $^{13}\text{C}$  NMR spectrum of 2,5-dichloro-3,6-bis({3-[(1,2,3,4-tetrahydroacridin-9-yl)amino]propyl}amino)cyclohexa-2,5-diene-1,4-dione (**9b**).

2,5-bis({3-[(6-chloro-1,2,3,4-tetrahydroacridin-9-yl)amino]propyl}amino)cyclohexa-2,5-diene-1,4-dione **9c**. Pink solid, m.p. 220-225 °C, yield 19 %.  $^1\text{H}$  NMR (300.13 MHz, DMSO- $d_6$ ):  $\delta$  1.76-1.84 (8H, m, H-2,3), 1.88 (4H, p,  $J$  = 6.8 Hz, H-2'), 2.64 (4H, broad s, H-4), 2.90 (4H, broad s, H-1), 3.20 (4H, dd,  $J$  = 12.9 and 6.5 Hz, H-3'), 3.59-3.67 (4H, m, H-1'), 5.19 (2H, s, H-3''), 7.39 (2H, d,  $J$  = 8.8 Hz, H-7), 7.73 (2H, d,  $J$  = 2.2 Hz, H-5), 7.85 (2H, t,  $J$  = 6.5 Hz, NH-benzoquinone), 8.20 (2H, d,  $J$  = 9.2 Hz, H-8).  $^{13}\text{C}$  NMR (75.47 MHz, DMSO- $d_6$ ):  $\delta$  22.0 (C-2,3), 28.9 (C-2'), 31.2 (C-4), 31.8 (C-1), 40.0 (C-3'),



45.5 (C-1'), 92.6 (C-3''), 114.6 (C-9a), 119.3 (C-8a), 124.5 (C-7), 124.7 (C-5), 126.6 (C-8), 134.6 (C-6), 148.1 (C-10a), 151.6 (C-9), 156.4 (C-4a), 170.4 (C-2''), 177.7 (C-1''). HRMS-ESI [m/z]: Calculated for C<sub>38</sub>H<sub>41</sub>Cl<sub>2</sub>N<sub>6</sub>O<sub>2</sub> [M+H]<sup>+</sup>: 683.2663; Determined 683.2651.

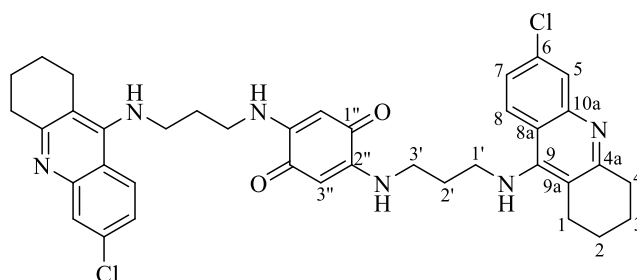

**Figure S59.** 2,5-bis(3-[(6-chloro-1,2,3,4-tetrahydroacridin-9-yl)amino]propyl)amino)cyclohexa-2,5-diene-1,4-dione (**9.c**).

2,5-dichloro-3,6-bis(3-[(6-chloro-1,2,3,4-tetrahydroacridin-9-yl)amino]propyl)amino)cyclohexa-2,5-diene-1,4-dione **9.d** Brown solid, m.p. 165-175 °C (deg), yield 29 %. <sup>1</sup>H NMR (300 MHz, DMSO-d<sub>6</sub>): δ 1.73-1.81 (8H, m, H-2,3), 1.87 (4H, p, *J* = 6.5 Hz, H-2'), 2.61-2.68 (4H, broad s, H-4), 2.81-2.89 (4H, broad s, H-1), 3.50 (4H, t, *J* = 6.5 Hz, H-3'), 3.67-3.77 (4H, m, H-1'), 5.91 (2H, broad s, NH-α), 7.31 (2H, dd, *J* = 9.1 and 2.3 Hz, H-7), 7.67 (2H, d, *J* = 2.3 Hz, H-5), 8.13 (2H, d, *J* = 9.1 Hz, H-8). <sup>13</sup>C NMR (75 MHz, DMSO-d<sub>6</sub>): δ 22.5 (C-3), 22.9 (C-2), 25.6 (C-4), 32.3 (C-2'), 33.6 (C-1), 41.8 (C-1'), 44.8 (C-3'), 115.9 (C-9a), 118.6 (C-8a), 124.0 (C-7), 125.8 (C-8), 126.5 (C-5), 133.2 (C-6), 135.4 (C-3''), 147.4 (C-10a), 150.9 (C-9), 159.1 (C-4a), 170.5 (C-2''), 171.7 (C-1''). HRMS-ESI [m/z]: Calculated for C<sub>38</sub>H<sub>39</sub>Cl<sub>4</sub>N<sub>6</sub>O<sub>2</sub> [M+H]<sup>+</sup>: 751.1883; Determined 751.1864.

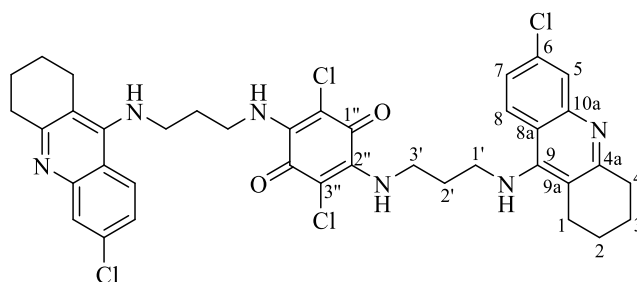

**Figure S60.** 2,5-dichloro-3,6-bis(3-[(6-chloro-1,2,3,4-tetrahydroacridin-9-yl)amino]propyl)amino)cyclohexa-2,5-diene-1,4-dione (**9.d**).

## Synthesis of $N^1,N^{12}$ -bis(7-chloroquinolin-4-yl)dodecane-1,12-diamine (**12**):

$N^1,N^{12}$ -bis(7-chloroquinolin-4-yl)dodecane-1,12-diamine **12**, Beige solid, 190-194 °C (188-190 °C)[17], yield 53 %.  $^1\text{H}$  NMR (500 MHz,  $\text{CDCl}_3$ ):  $\delta$  1.27-1.33 (8H, m, H-5',6',7',8'), 1.33-1.40 (4H, m, H-4'; 9'), 1.46 (4H, p,  $J$  = 7.3 and 6.8 Hz, H-2',11'), 1.76 (4H, p,  $J$  = 7.3 Hz, H-3',10'), 3.31 (4H, td,  $J$  = 7.2 and 5.1 Hz, H-1',12'), 4.98 (2H, broad s, NH), 6.42 (2H, d,  $J$  = 5.4 Hz, H-3), 7.37 (2H, dd,  $J$  = 8.9 and 2.2 Hz, H-6), 7.66 (2H, d,  $J$  = 8.9 Hz, H-5), 7.96 (2H, d,  $J$  = 2.2 Hz, H-8), 8.54 (2H, d,  $J$  = 5.4 Hz, H-2).  $^{13}\text{C}$  NMR (125 MHz,  $\text{CDCl}_3$ ):  $\delta$  27.1 (C-2',11'), 28.9 (C-3',10'), 29.3 (C-4',9'), 29.5 (C-6',7'), 29.5 (C-5',8'), 43.3 (C-1',12'), 99.1 (C-3), 117.1 (C-4a), 120.8 (C-5), 125.3 (C-6), 128.8 (C-8), 134.9 (C-8a), 149.0 (C-7), 149.8 (C-4), 152.0 (C-2). HRMS-ESI [ $m/z$ ]: Calculated for  $\text{C}_{30}\text{H}_{37}\text{Cl}_2\text{N}_4[\text{M}+\text{H}]^+$ : 523.2390; Determined: 523.2410.

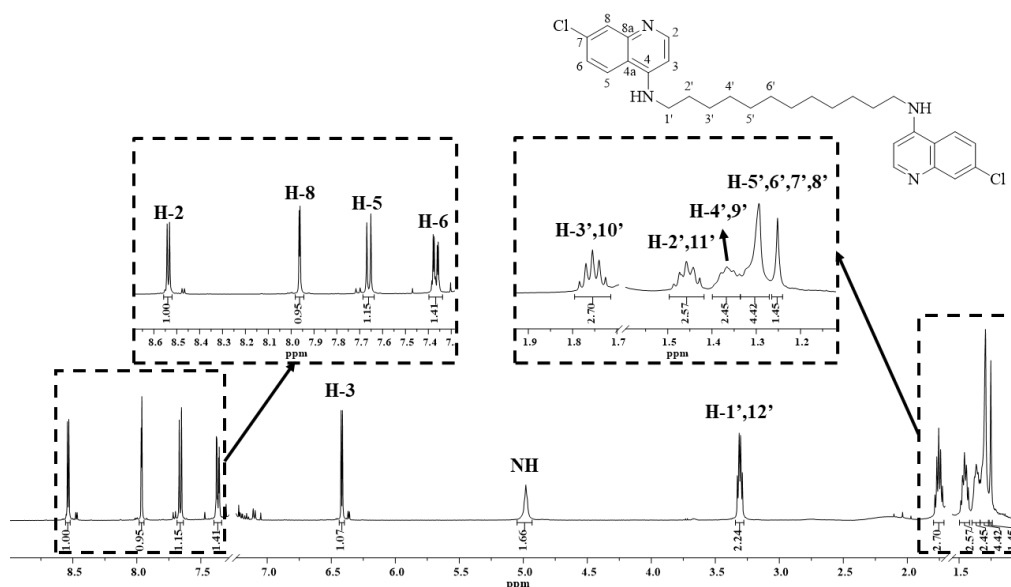

Figure S61.  $^1\text{H}$  NMR spectrum of  $N^1,N^{12}$ -bis(7-chloroquinolin-4-yl)dodecane-1,12-diamine (**12**).

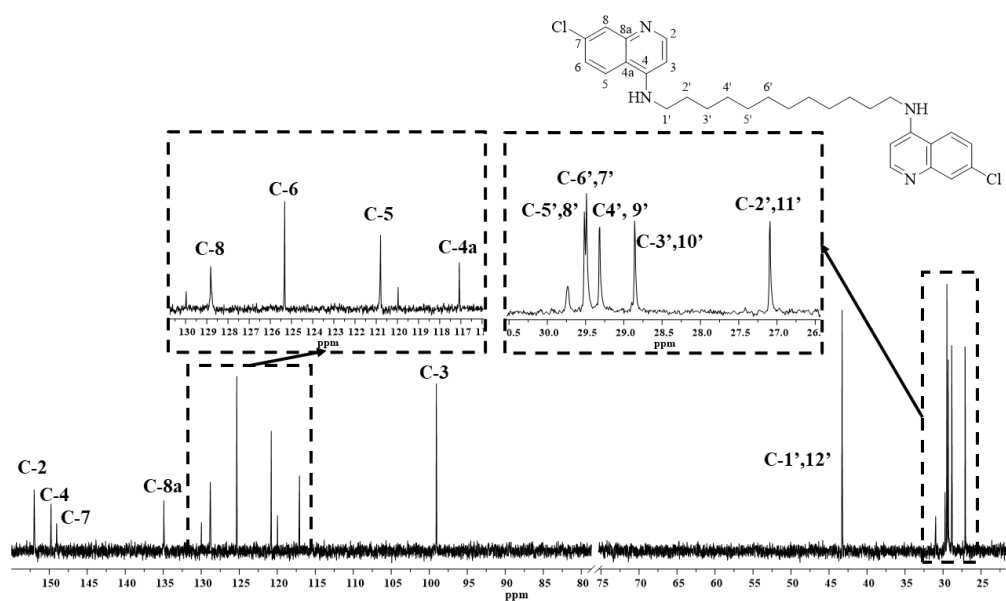

Figure S62.  $^{13}\text{C}$  NMR spectrum of  $N^1,N^{12}$ -bis(7-chloroquinolin-4-yl)dodecane-1,12-diamine (12).
